# Supplementary material for: Synthesis of complex intermediates for the study of a dehydratase from borrelidin biosynthesis
Source: PubMed Central journal article supplement (PMC3999764; doi:10.3762/bjoc.10.55), 2014-03-11

## Supporting information

for

# Synthesis of complex intermediates for the study of a dehydratase from borrelidin biosynthesis

Frank Hahn<sup>\*,§1,2</sup>, Nadine Kandziora<sup>§1</sup>, Steffen Friedrich<sup>1</sup> and Peter F. Leadlay<sup>2</sup>

Address: <sup>1</sup>Institut für Organische Chemie und Biomolekulares Wirkstoffzentrum,  
Leibniz Universität Hannover, Schneiderberg 1B, 30167 Hannover, Germany and

<sup>2</sup>Department of Biochemistry, University of Cambridge, 80 Tennis Court Road,  
Cambridge CB2 1GA, United Kingdom

Email: Frank Hahn - frank.hahn@oci.uni-hannover.de

\*Corresponding author

§These authors contributed equally

## NMR spectra

CDCl<sub>3</sub>, 200 MHz

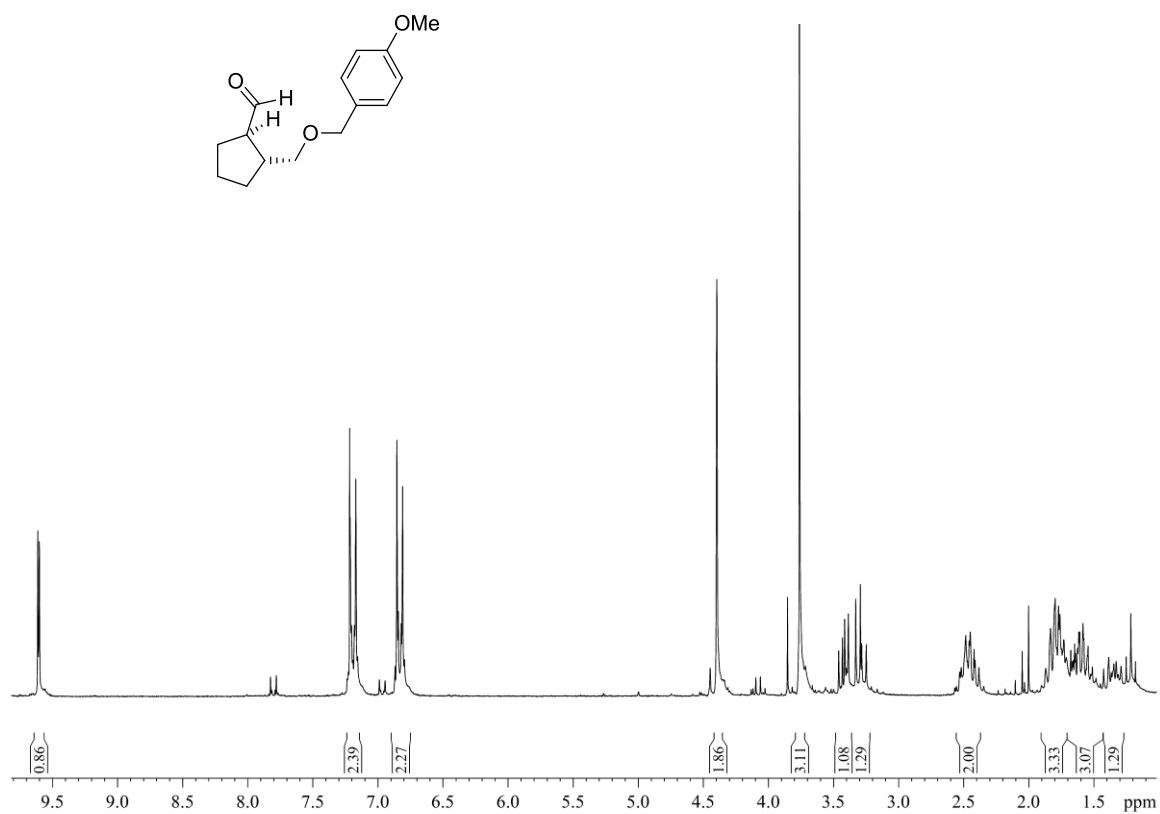

CDCl<sub>3</sub>, 200 MHz

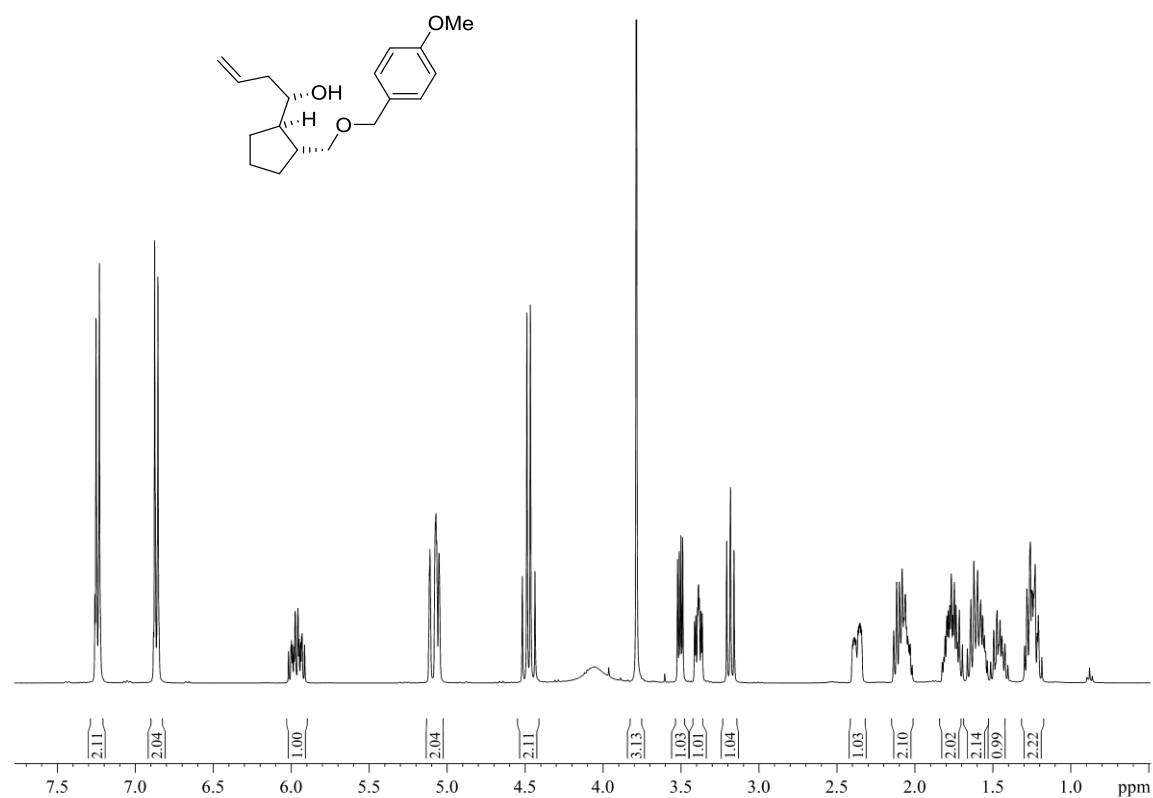

CDCl<sub>3</sub>, 400 MHz

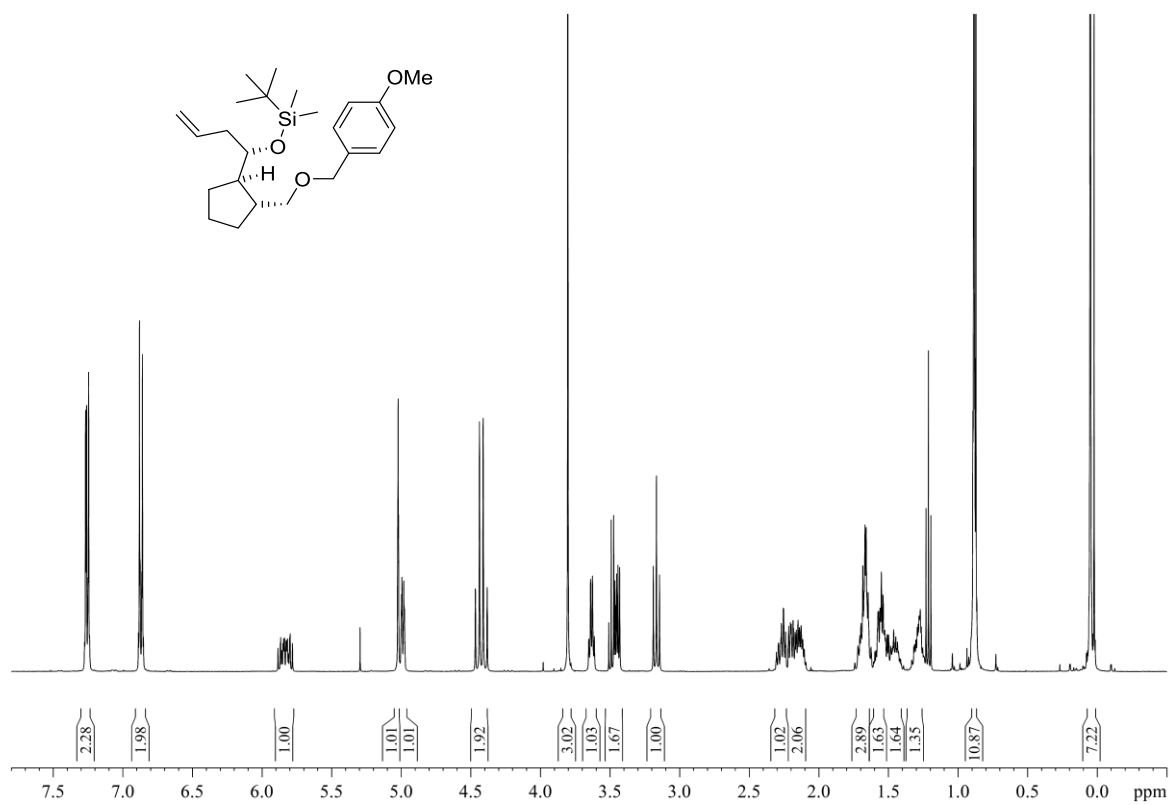

CDCl<sub>3</sub>, 200 MHz

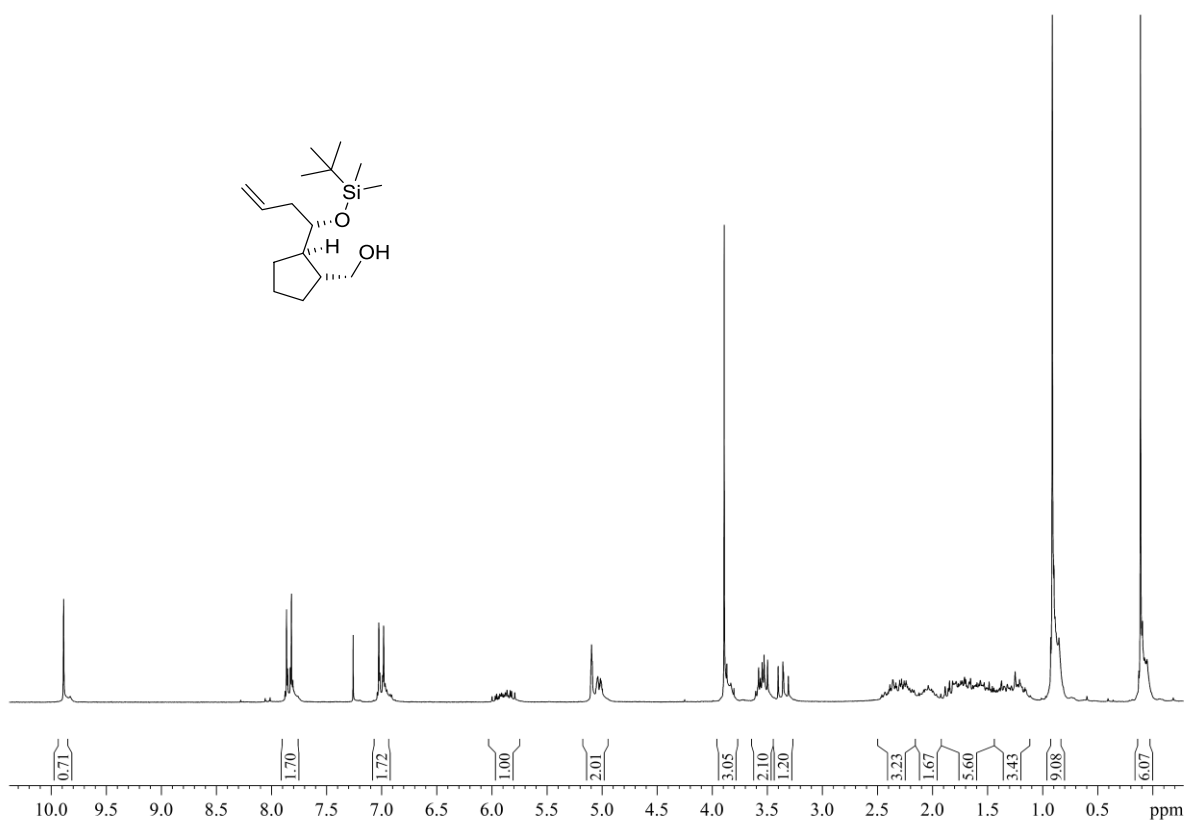

CDCl<sub>3</sub>, 200 MHz

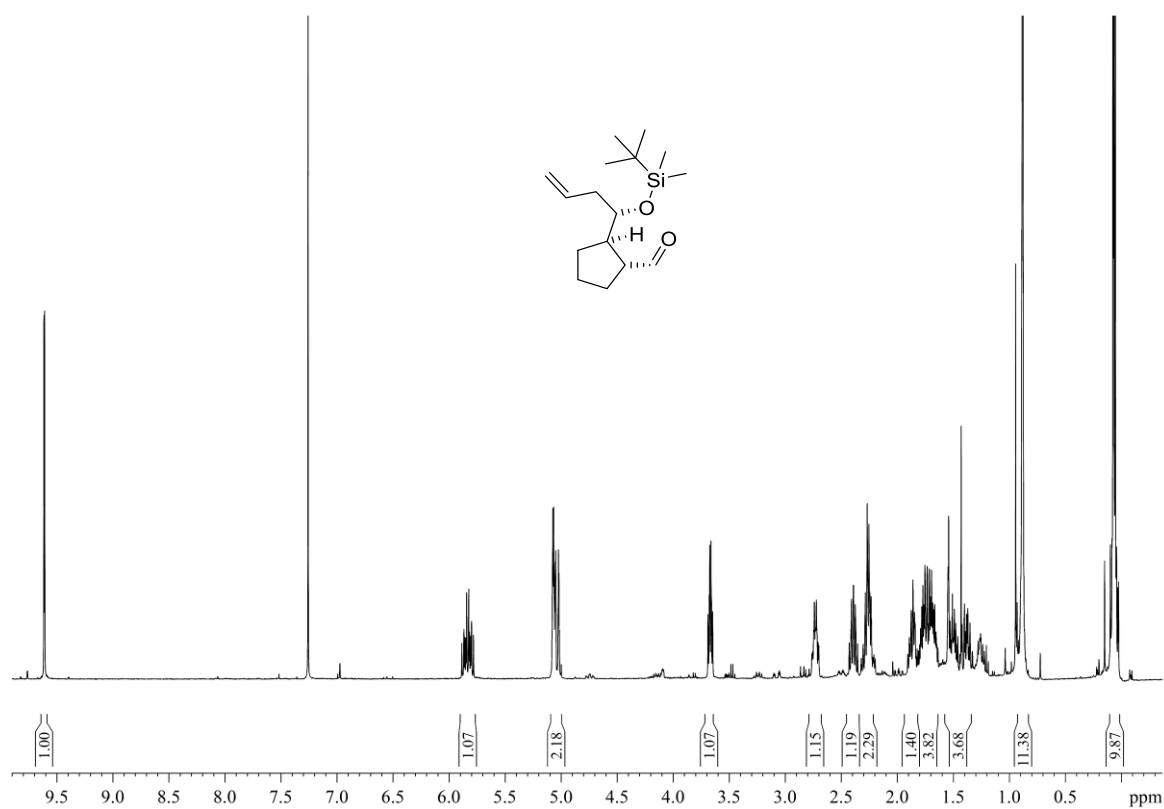

CDCl<sub>3</sub>, 100 MHz

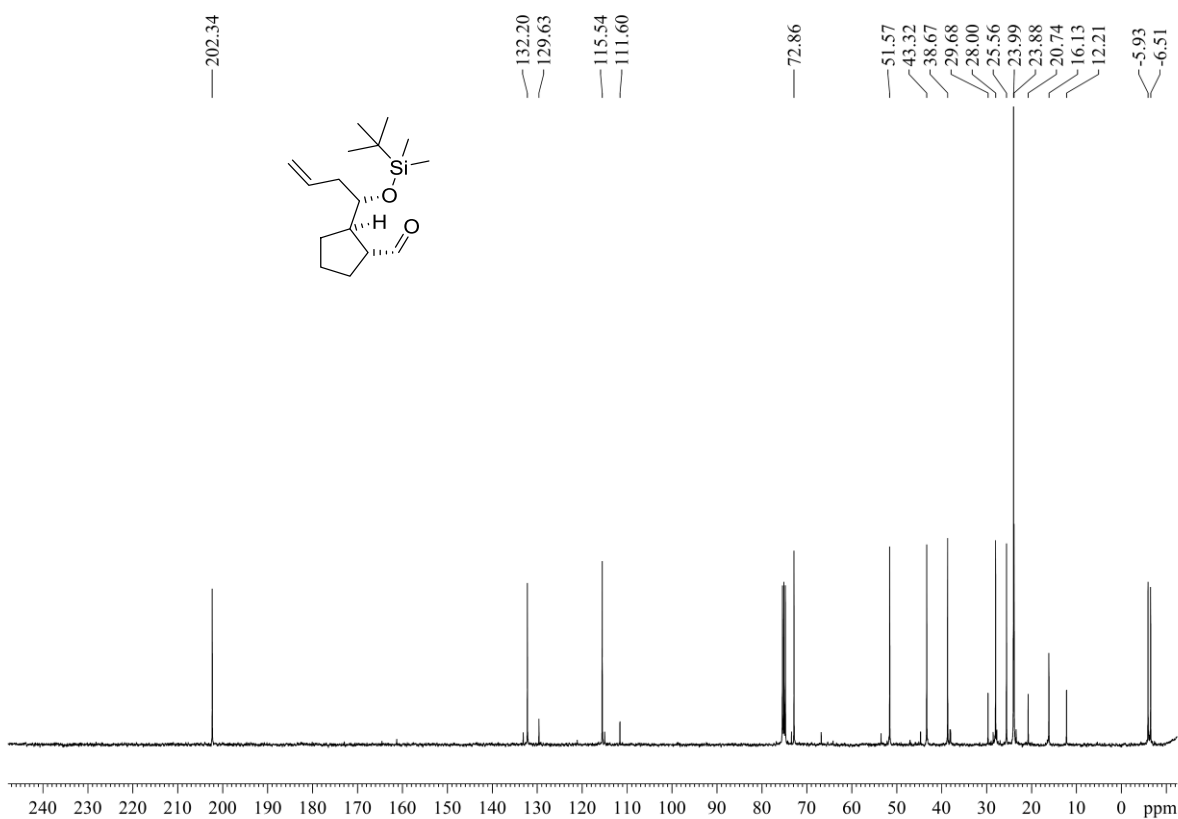

MeOD, 400 MHz

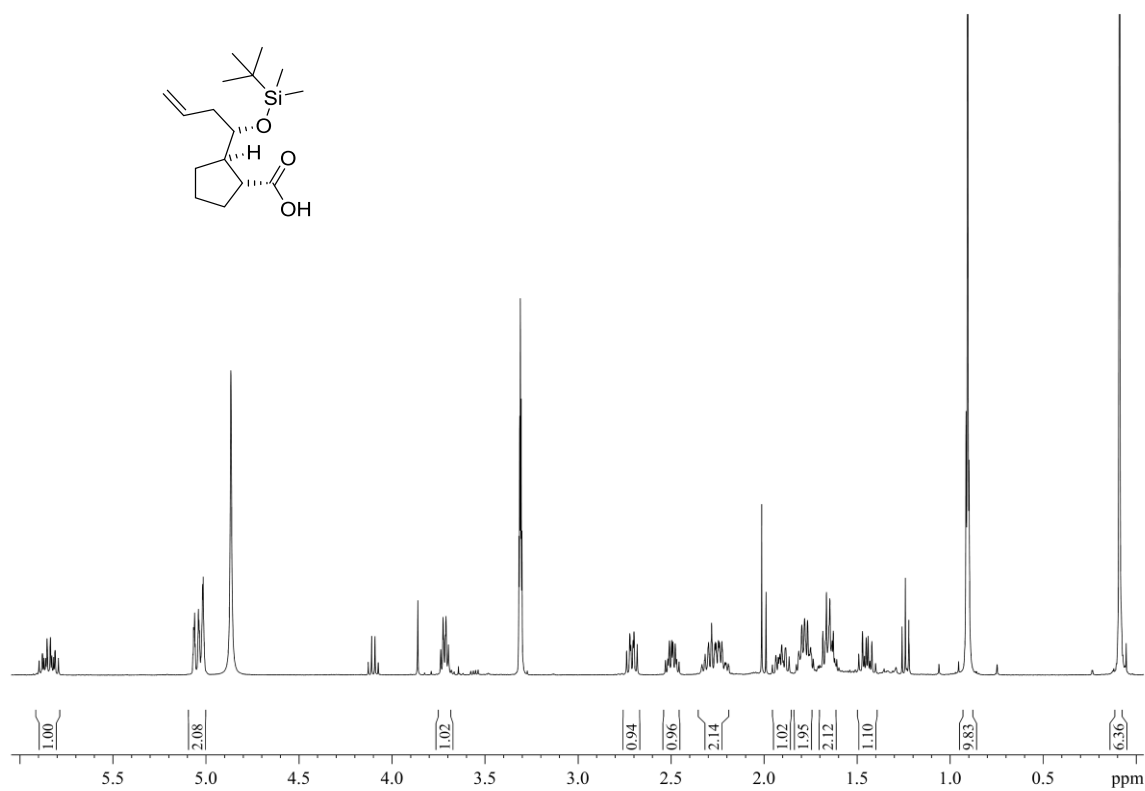

MeOD, 100 MHz

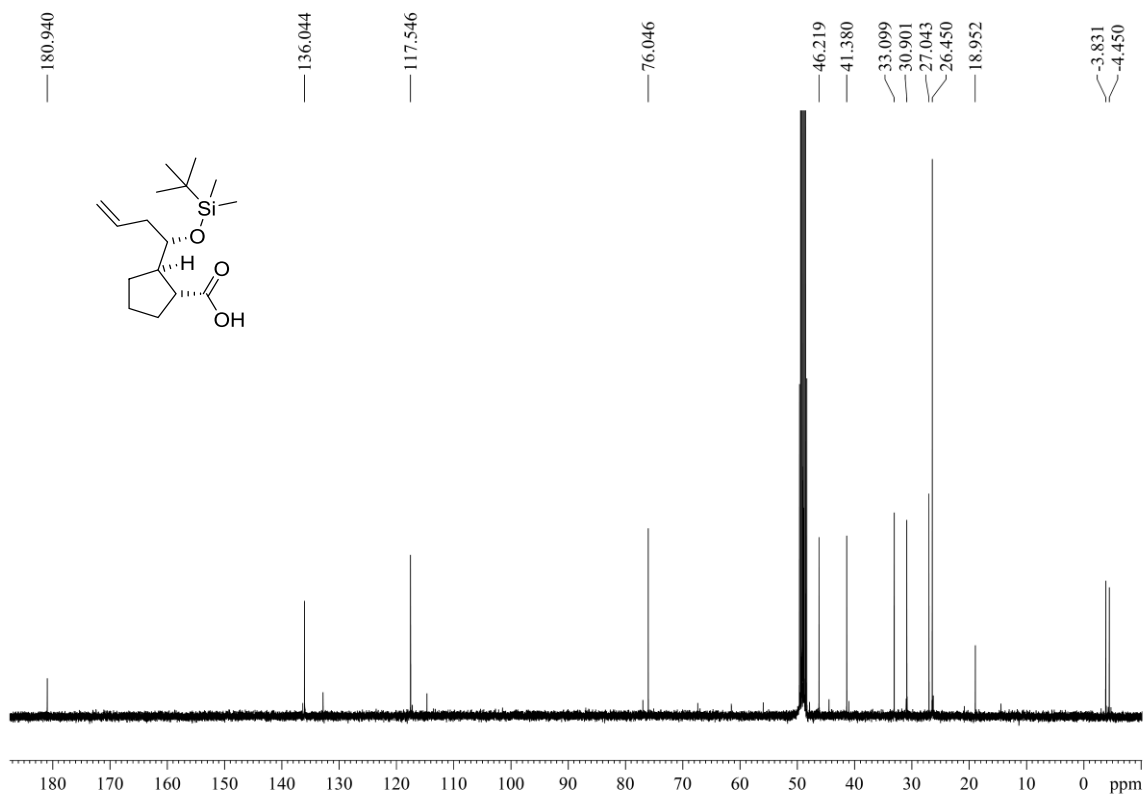

CDCl<sub>3</sub>, 400 MHz

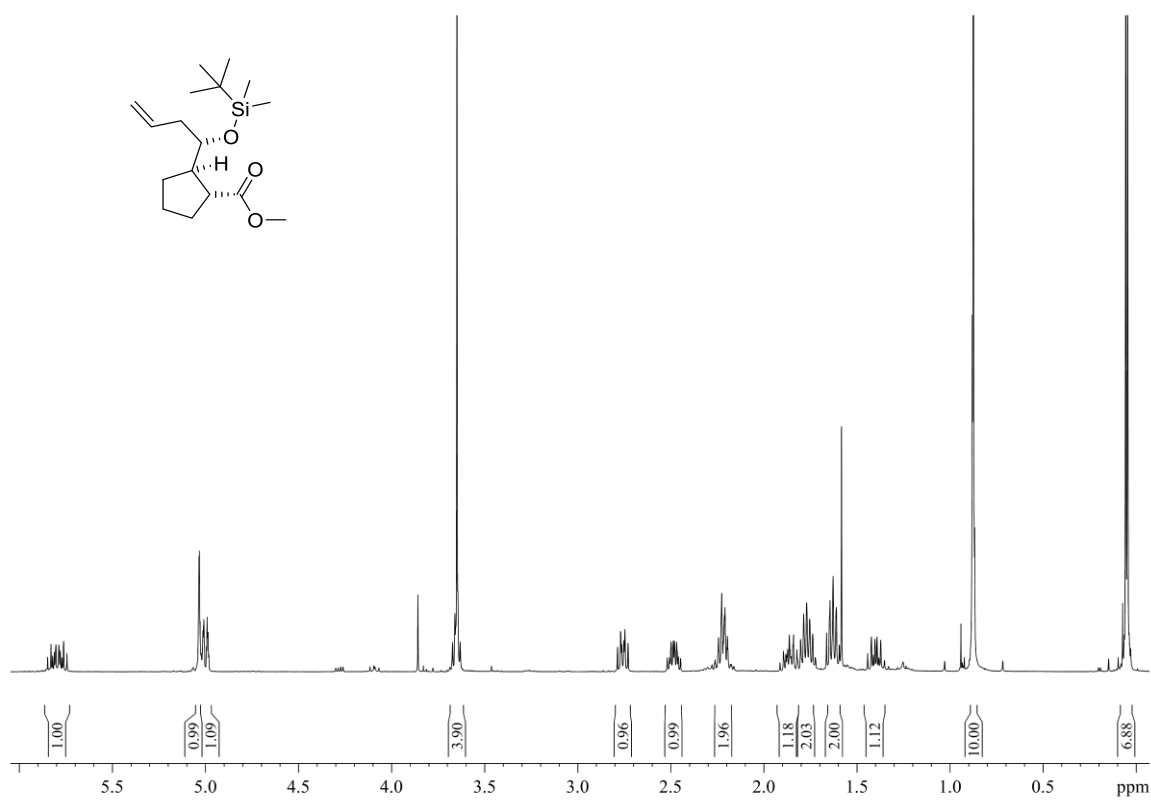

CDCl<sub>3</sub>, 100 MHz

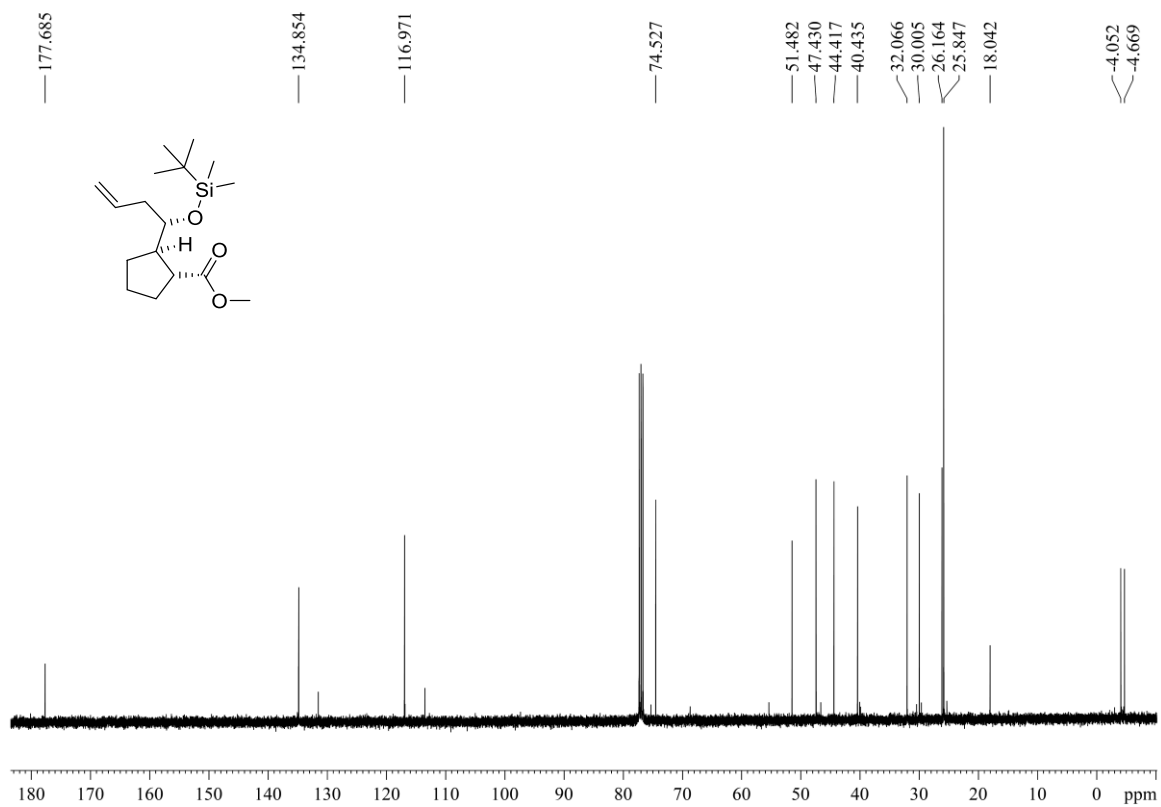

CDCl<sub>3</sub>, 200 MHz

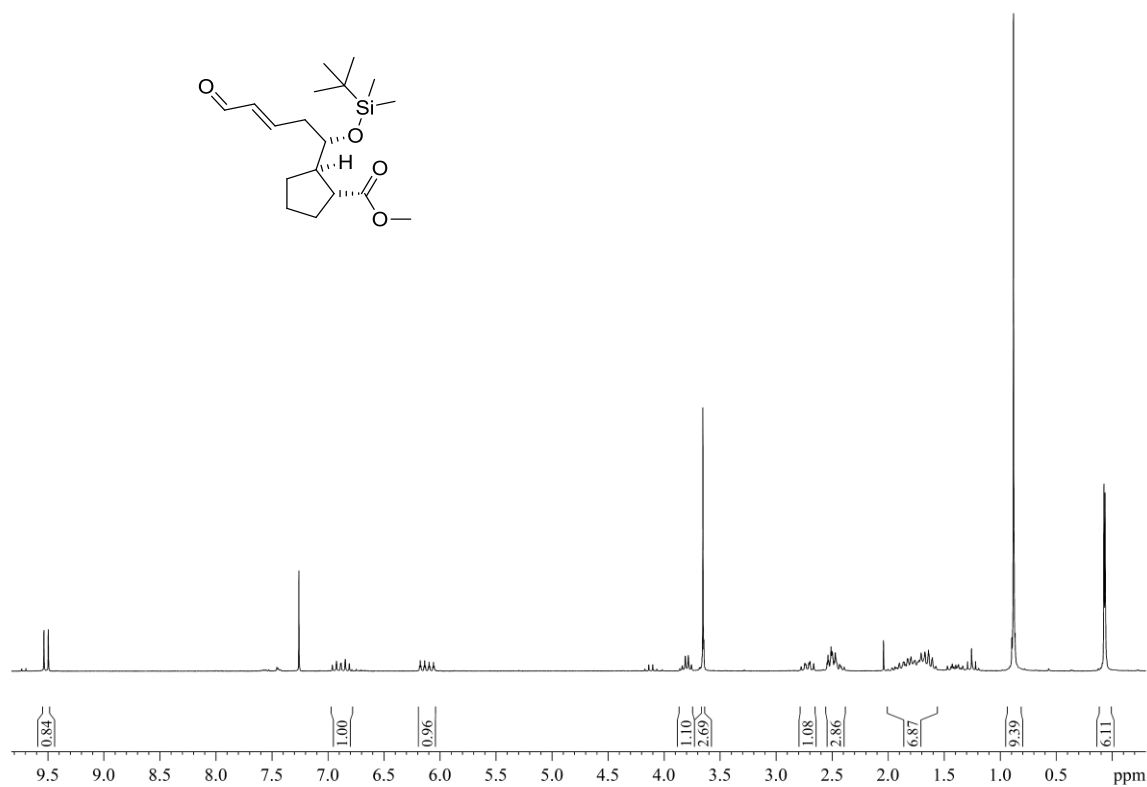

d<sub>6</sub>-benzene, 400 MHz

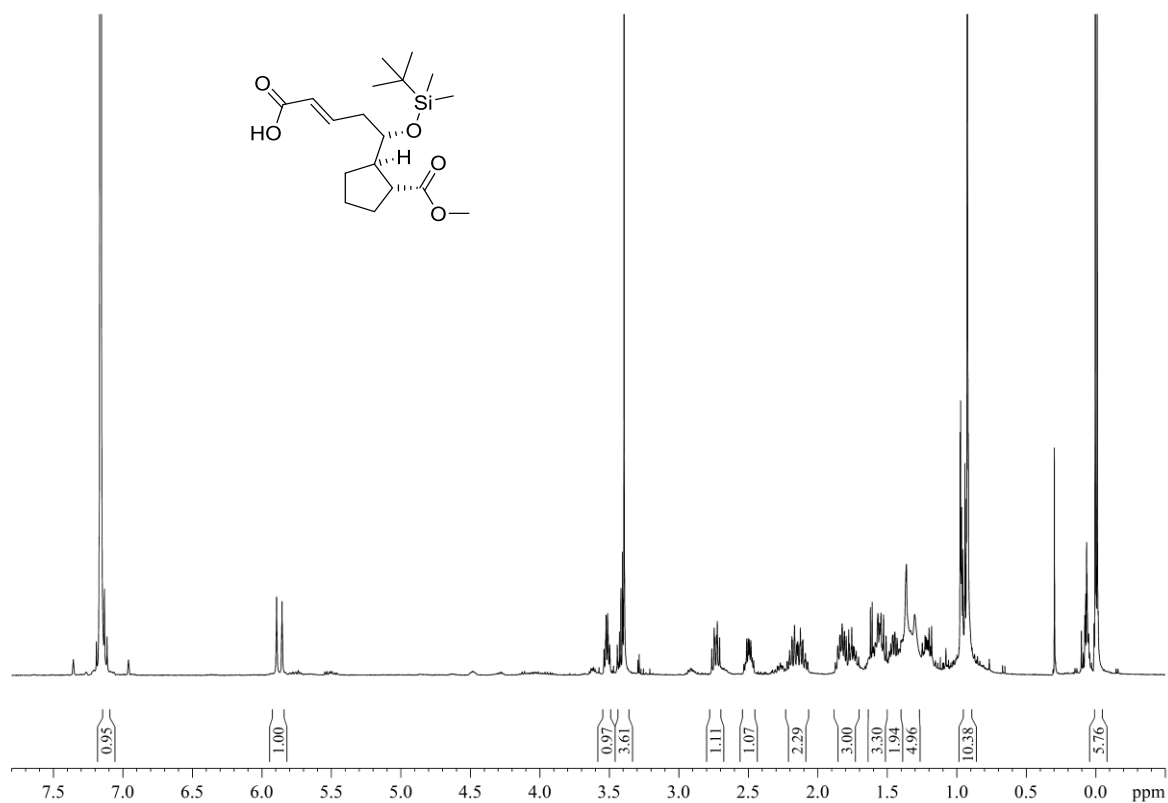

d<sub>6</sub>-benzene, 100 MHz

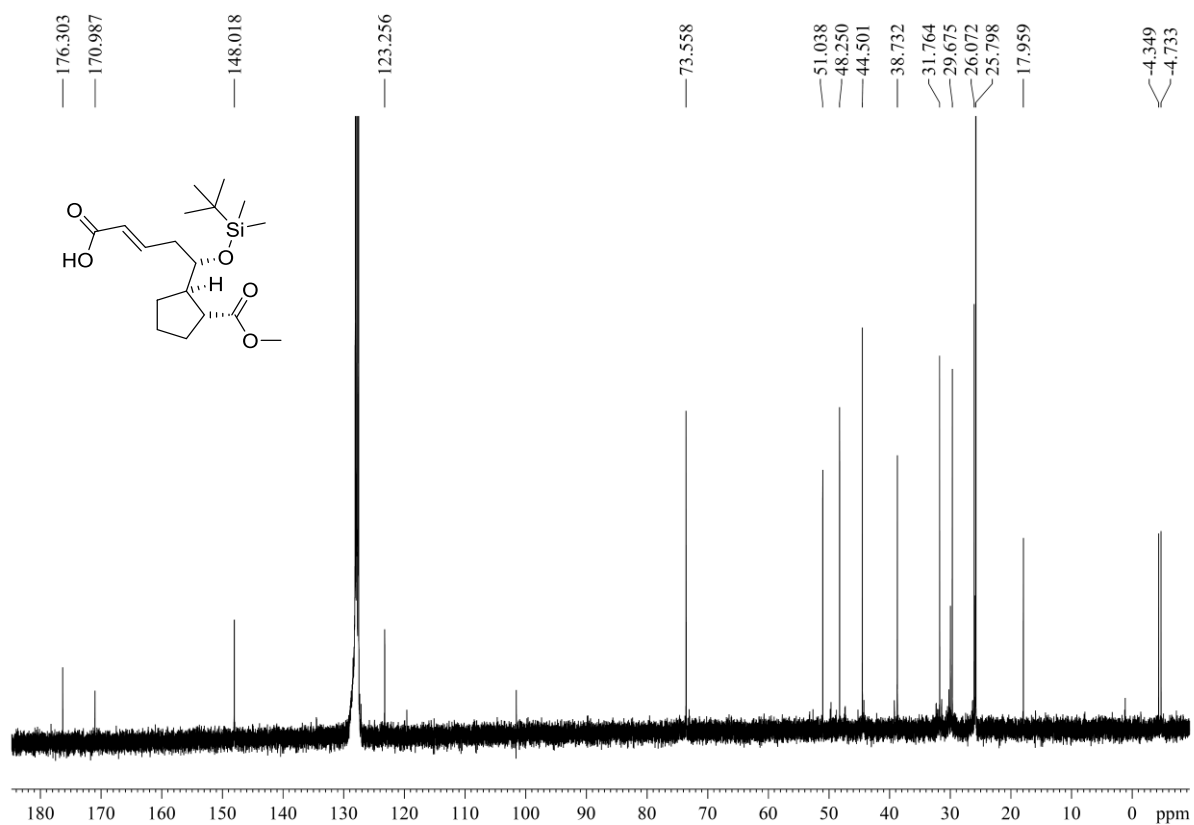

CDCl<sub>3</sub>, 400 MHz

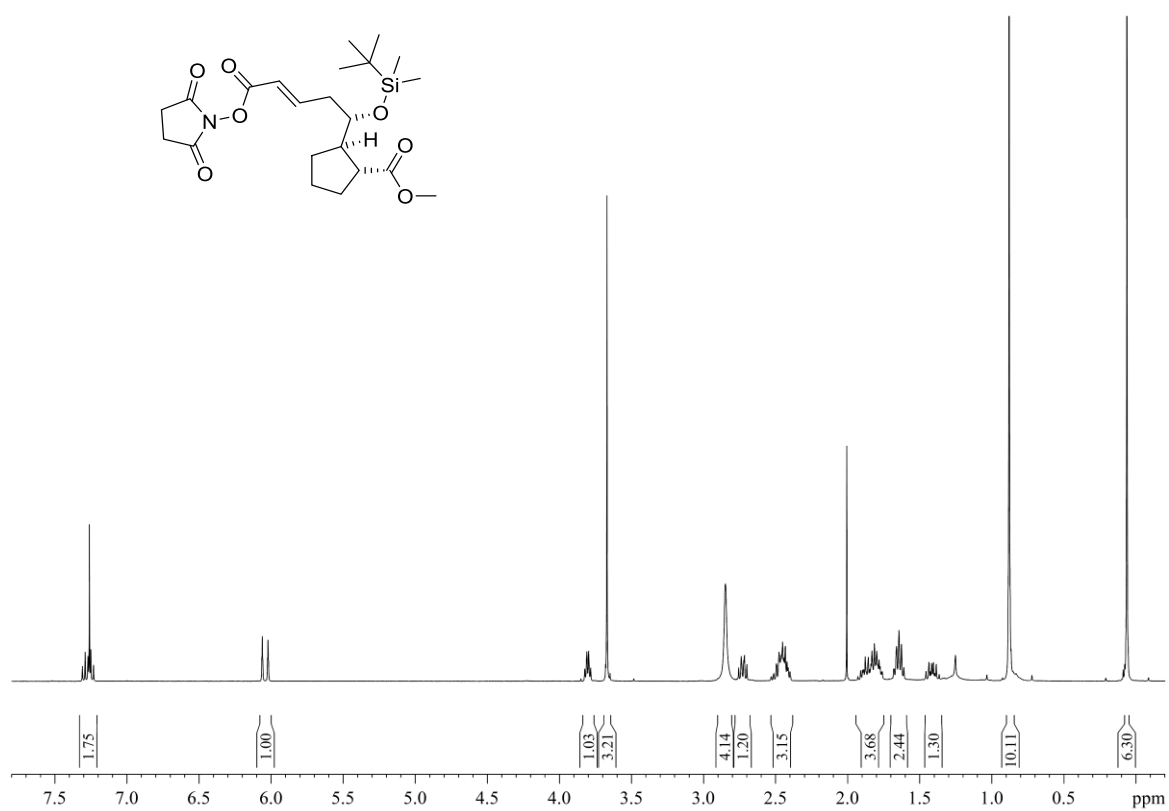



CDCl<sub>3</sub>, 100 MHz

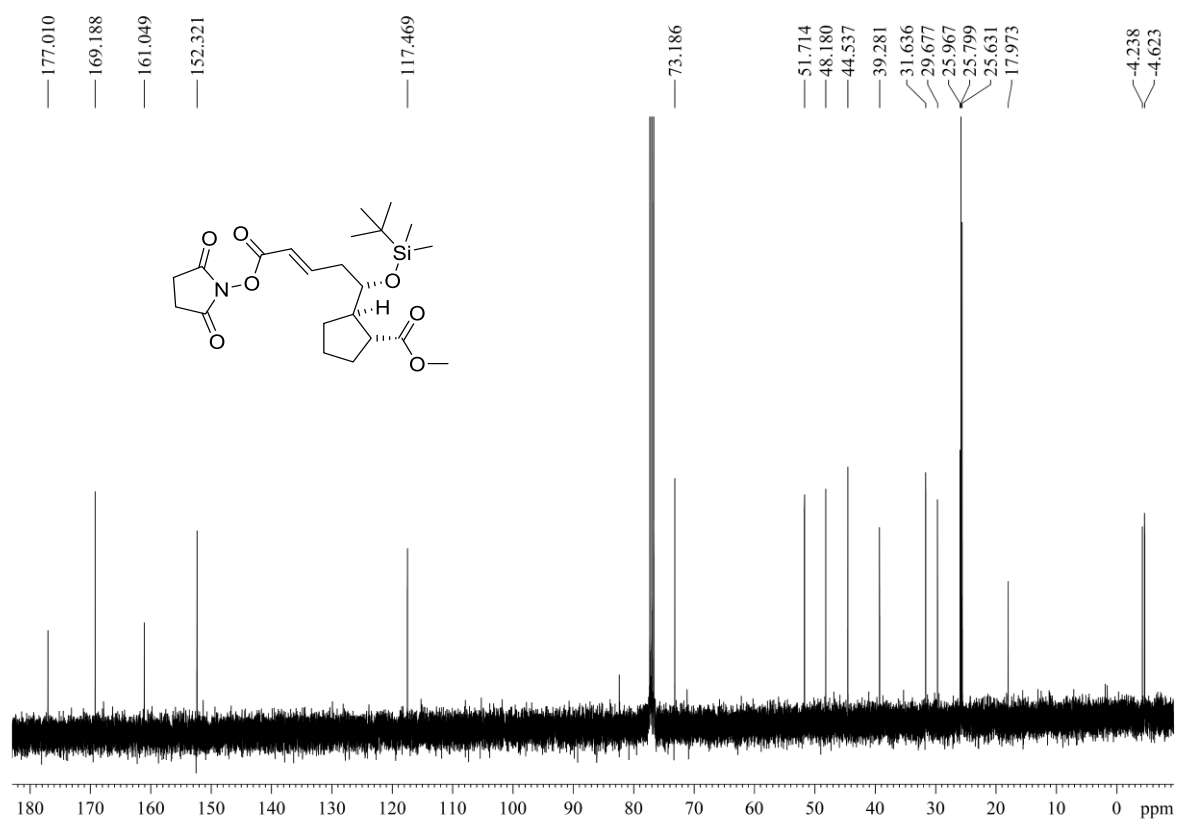

D<sub>2</sub>O, 400 MHz

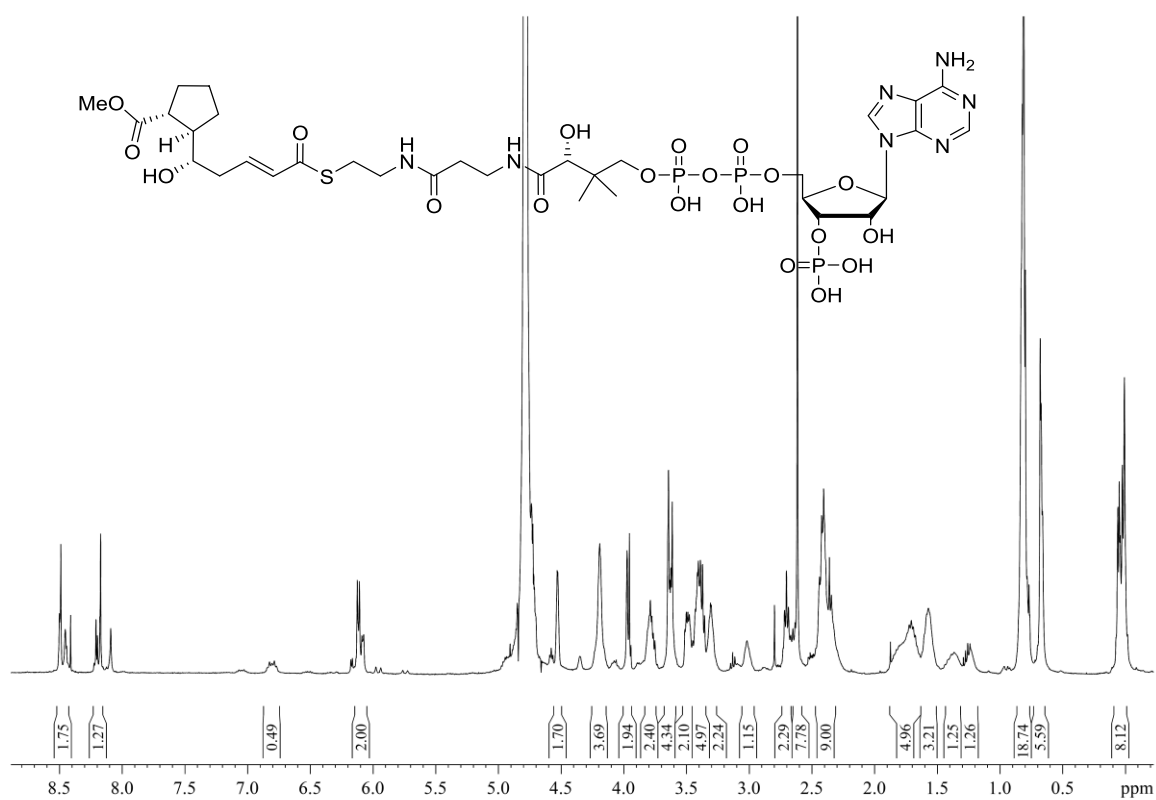

CDCl<sub>3</sub>, 400 MHz

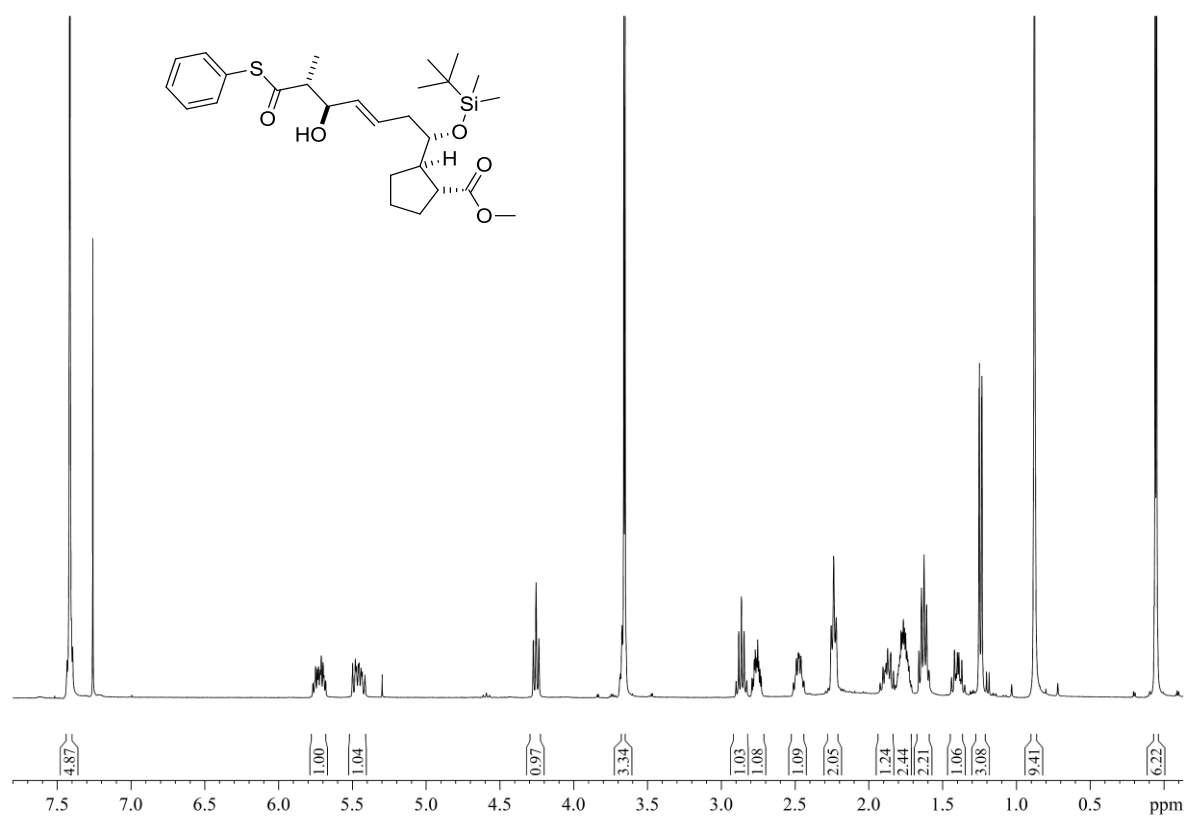

CDCl<sub>3</sub>, 100 MHz

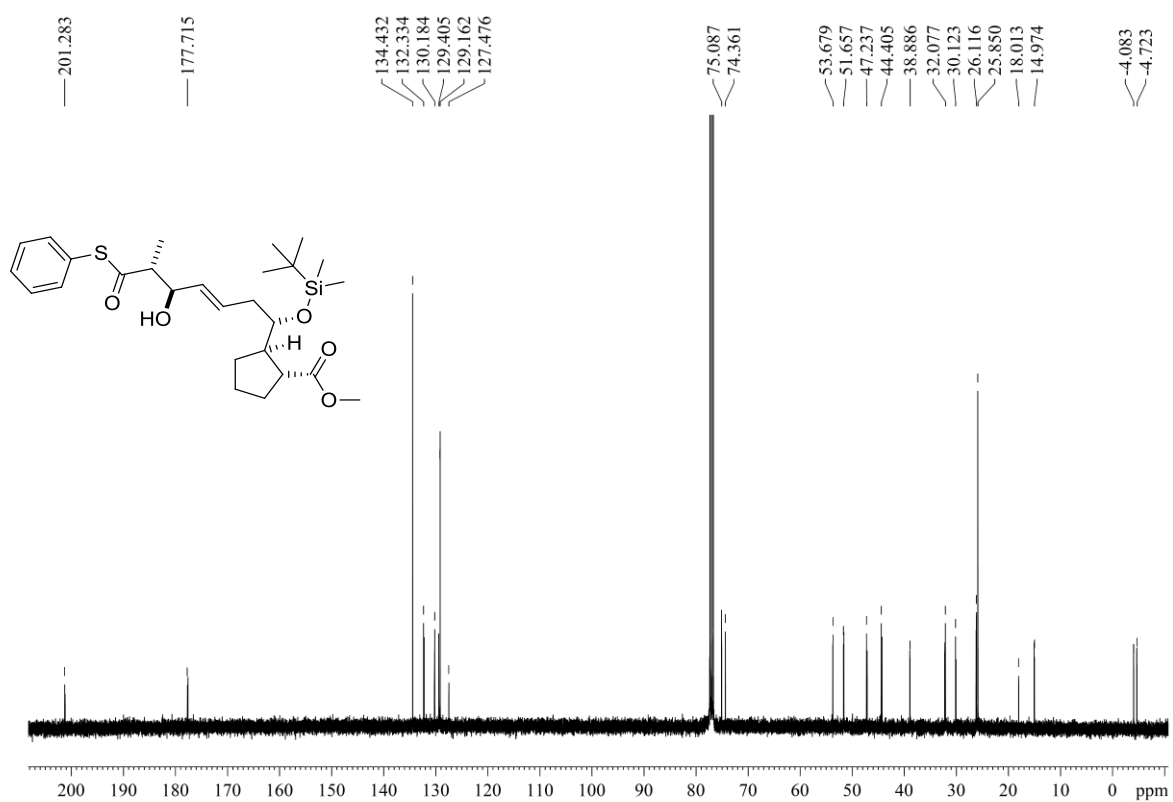

CDCl<sub>3</sub>, 500 MHz

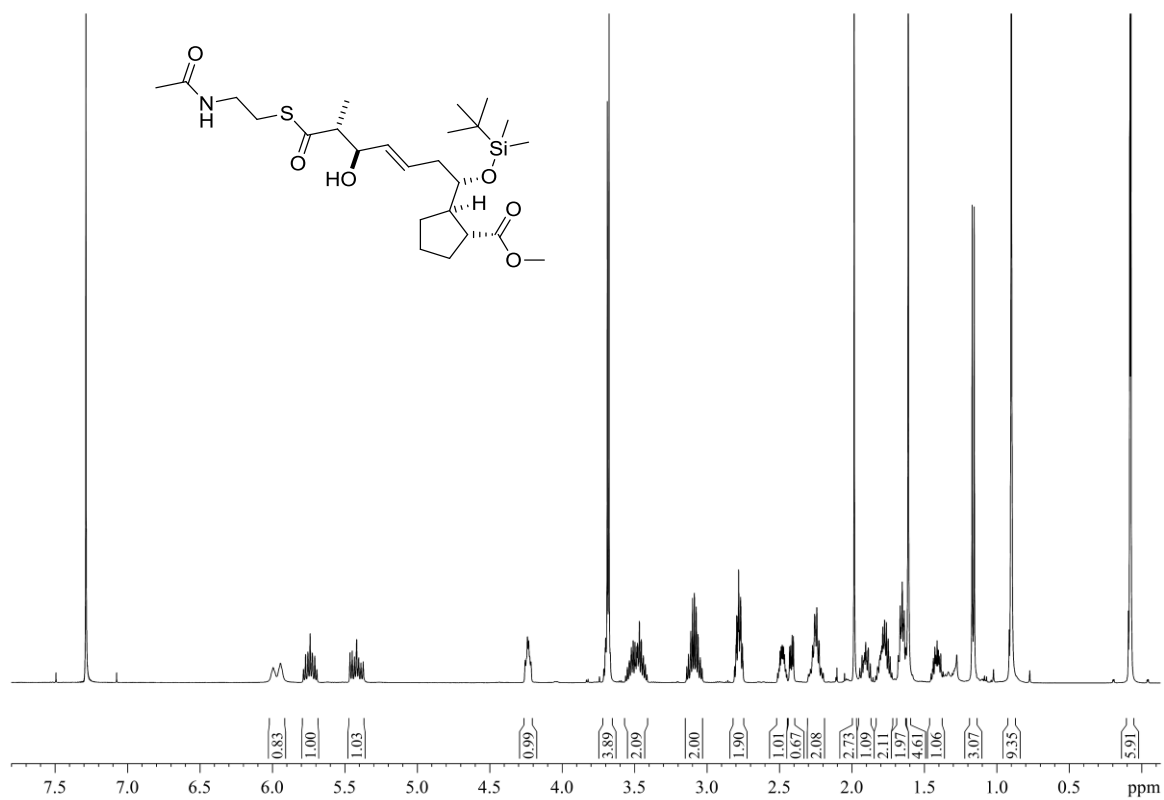

CDCl<sub>3</sub>, 125 MHz

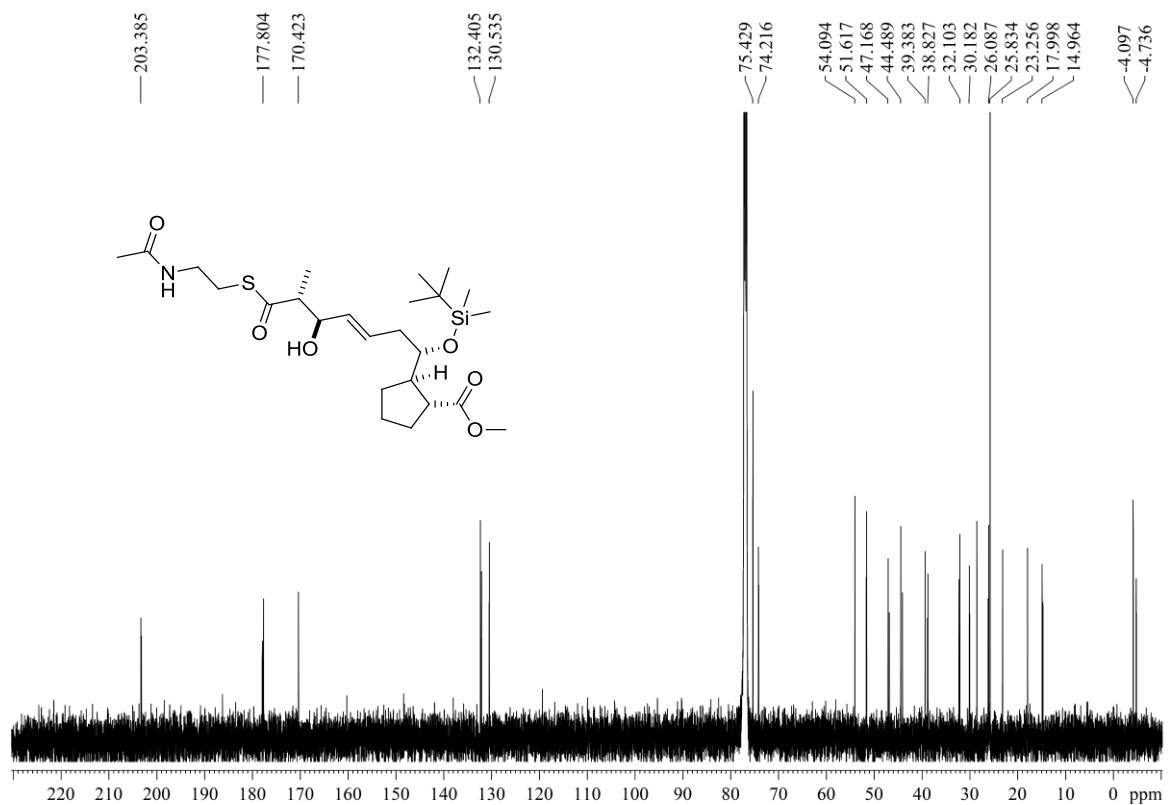

CD<sub>2</sub>Cl<sub>2</sub>, 400 MHz

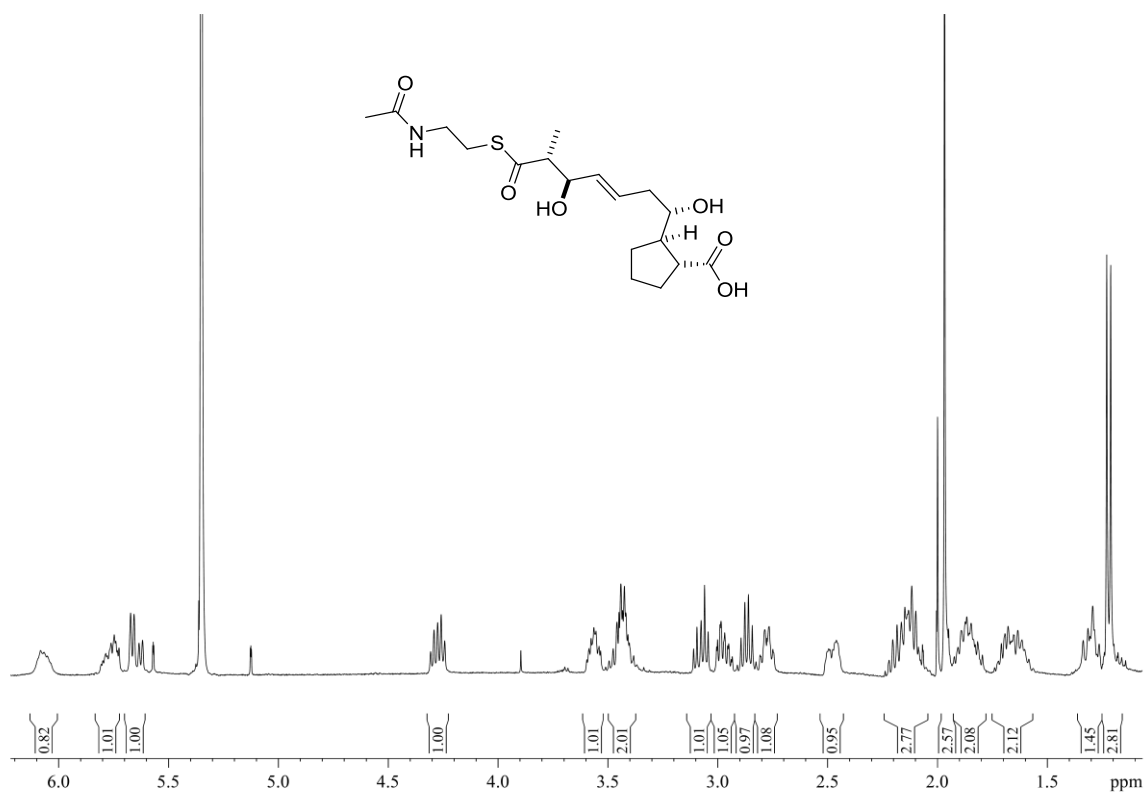

CD<sub>2</sub>Cl<sub>2</sub>, 100 MHz

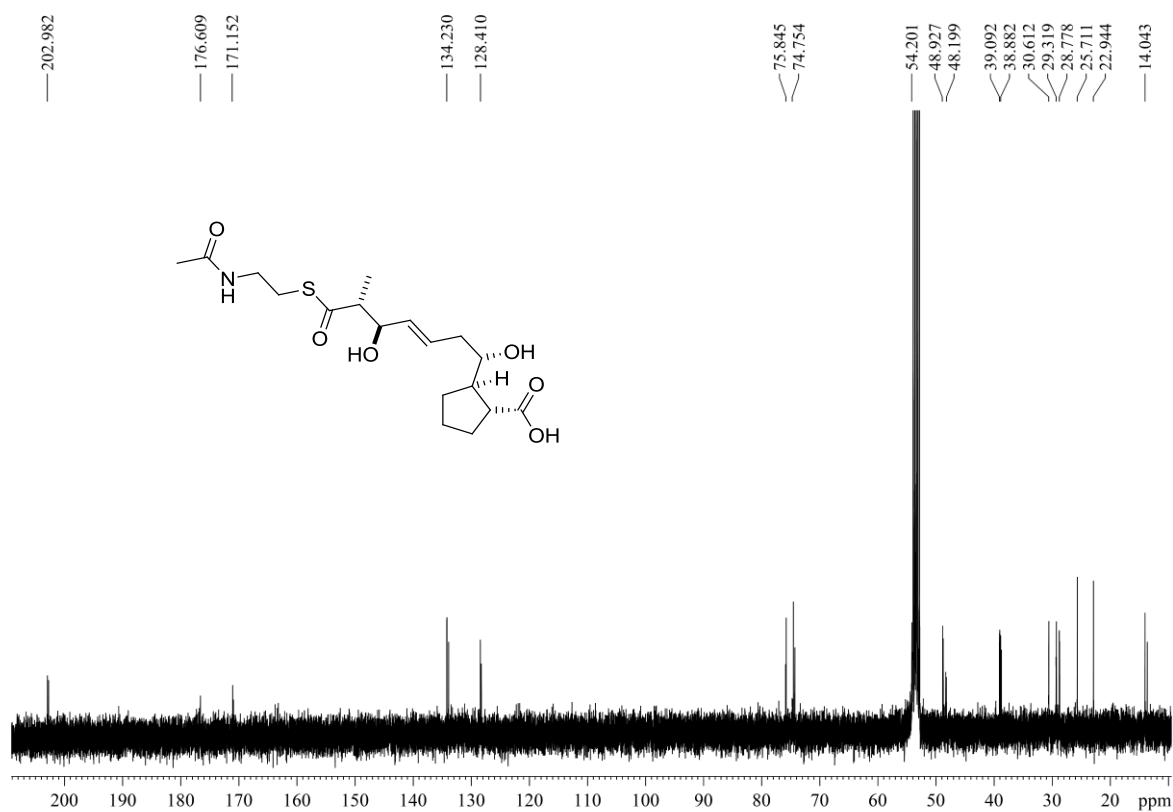

d<sub>6</sub>-benzene, 500 MHz

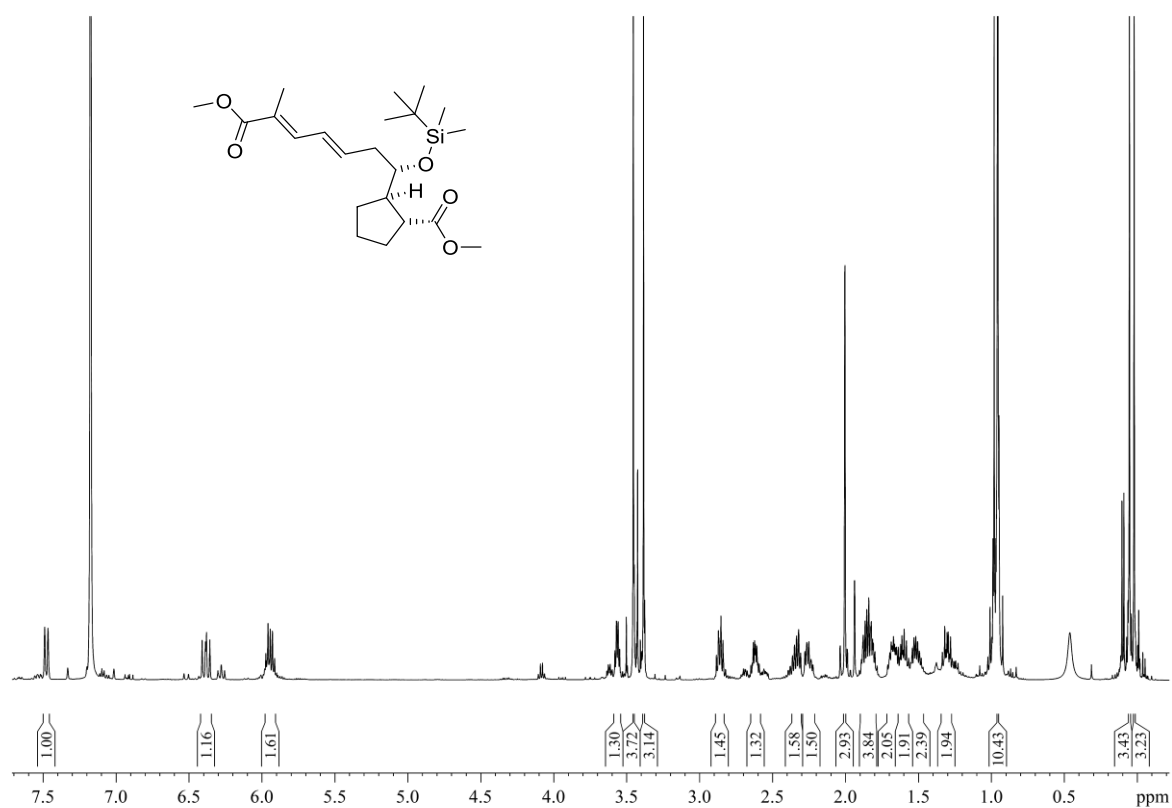

d<sub>6</sub>-benzene, 125 MHz

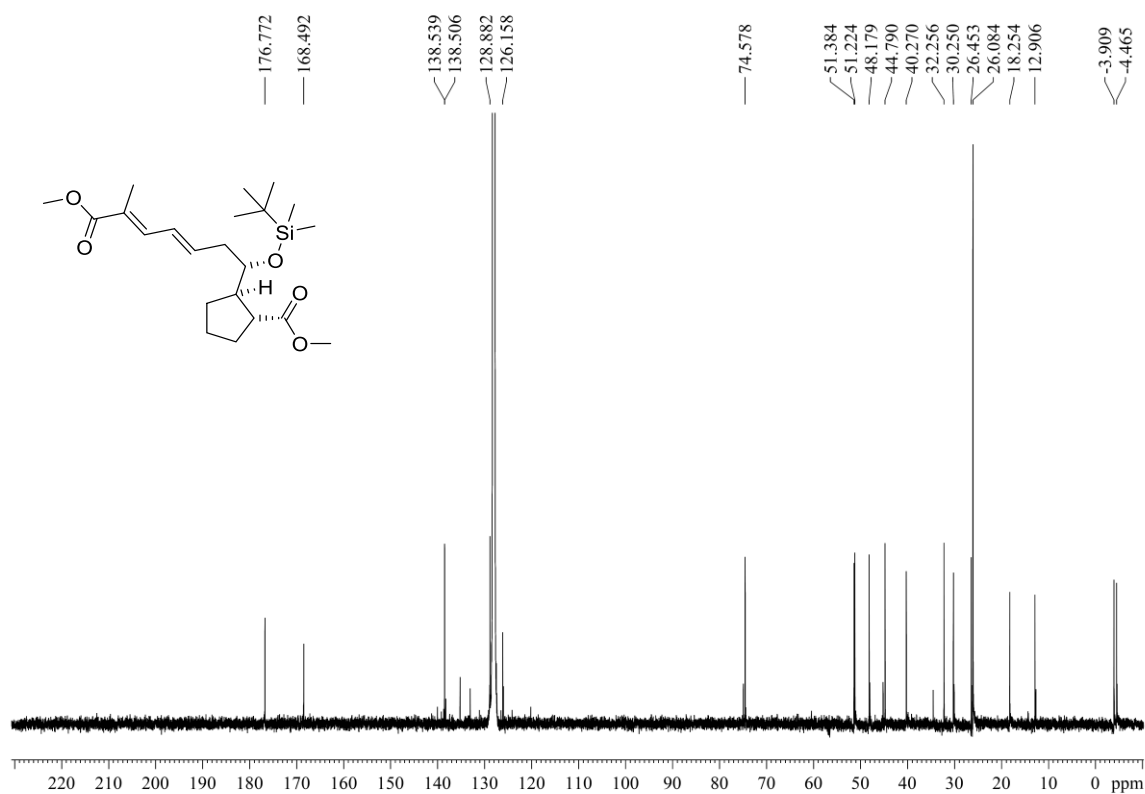

CDCl<sub>3</sub>, 400 MHz

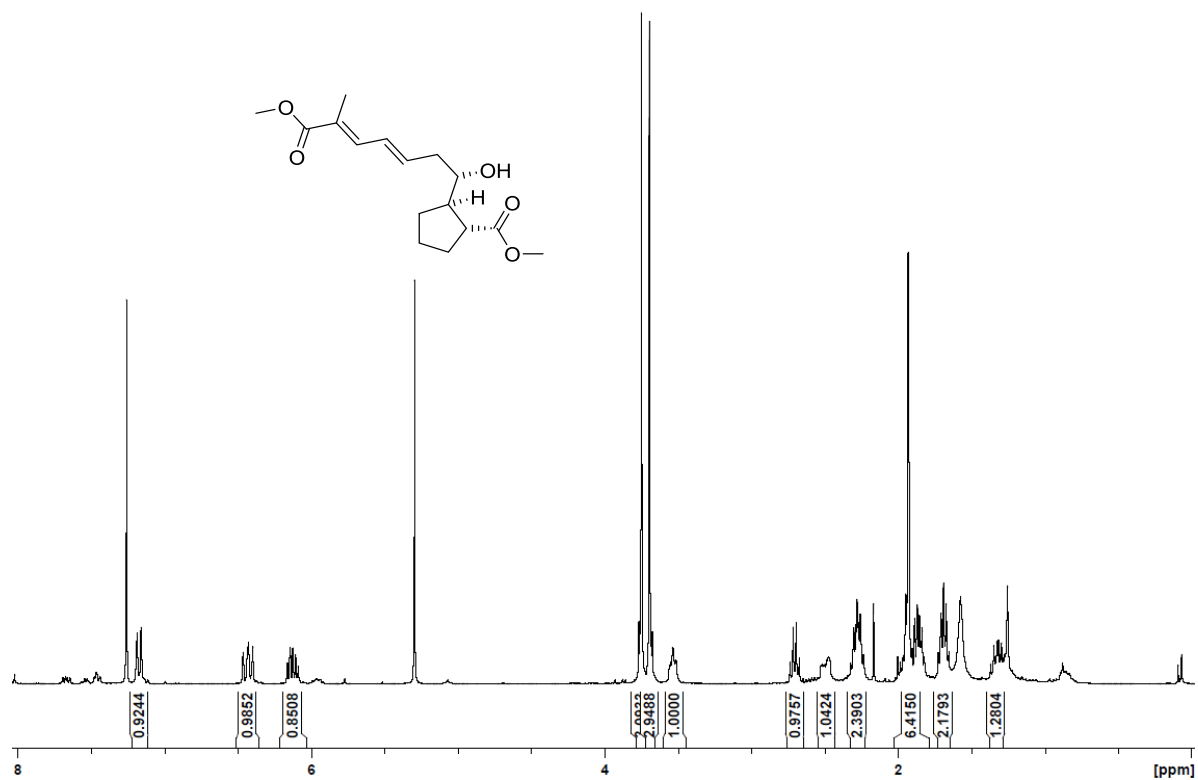

CDCl<sub>3</sub>, 100 MHz

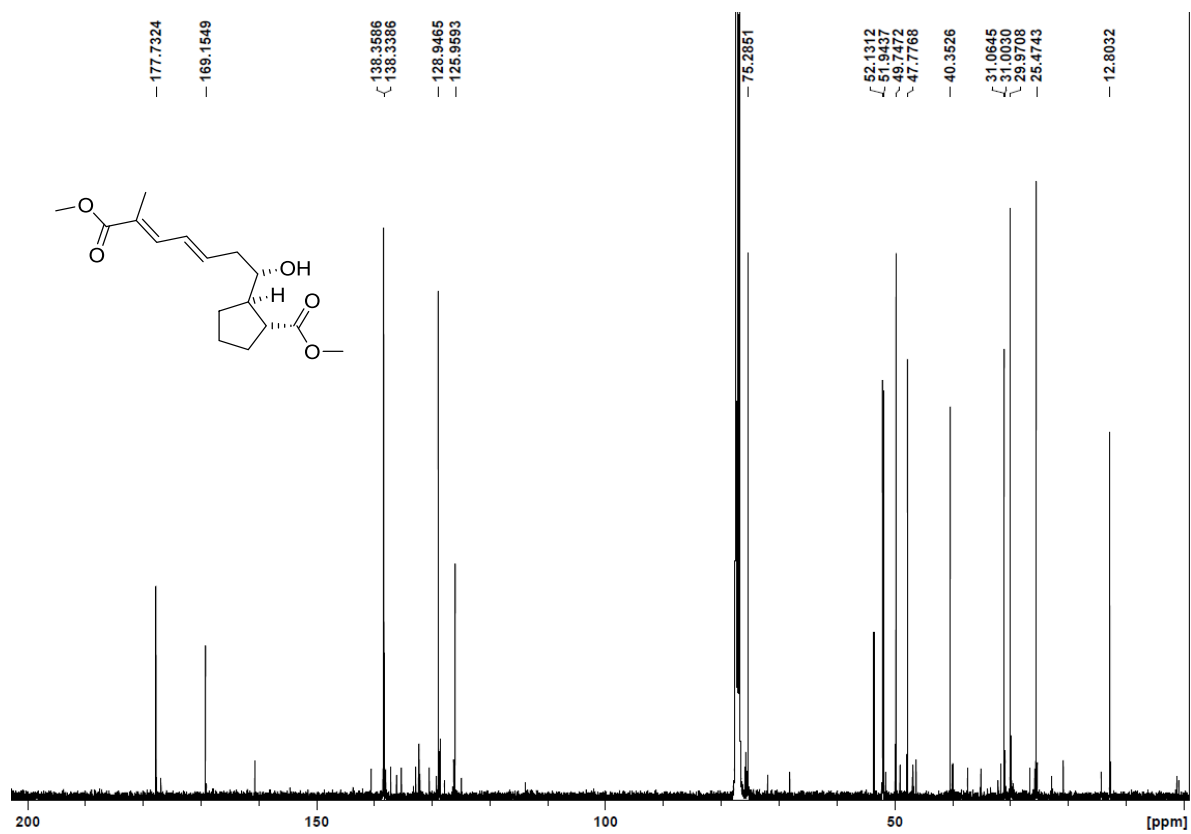

d<sub>6</sub>-benzene, 500 MHz

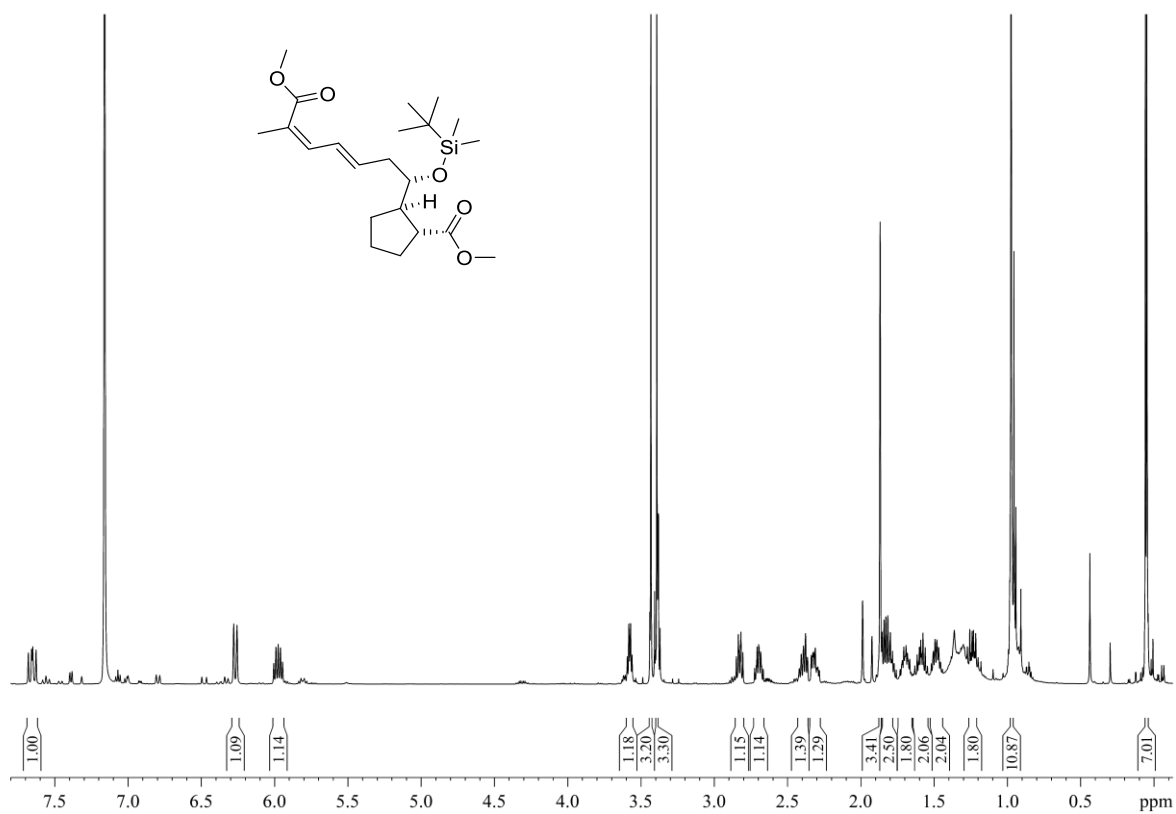

d<sub>6</sub>-benzene, 125 MHz

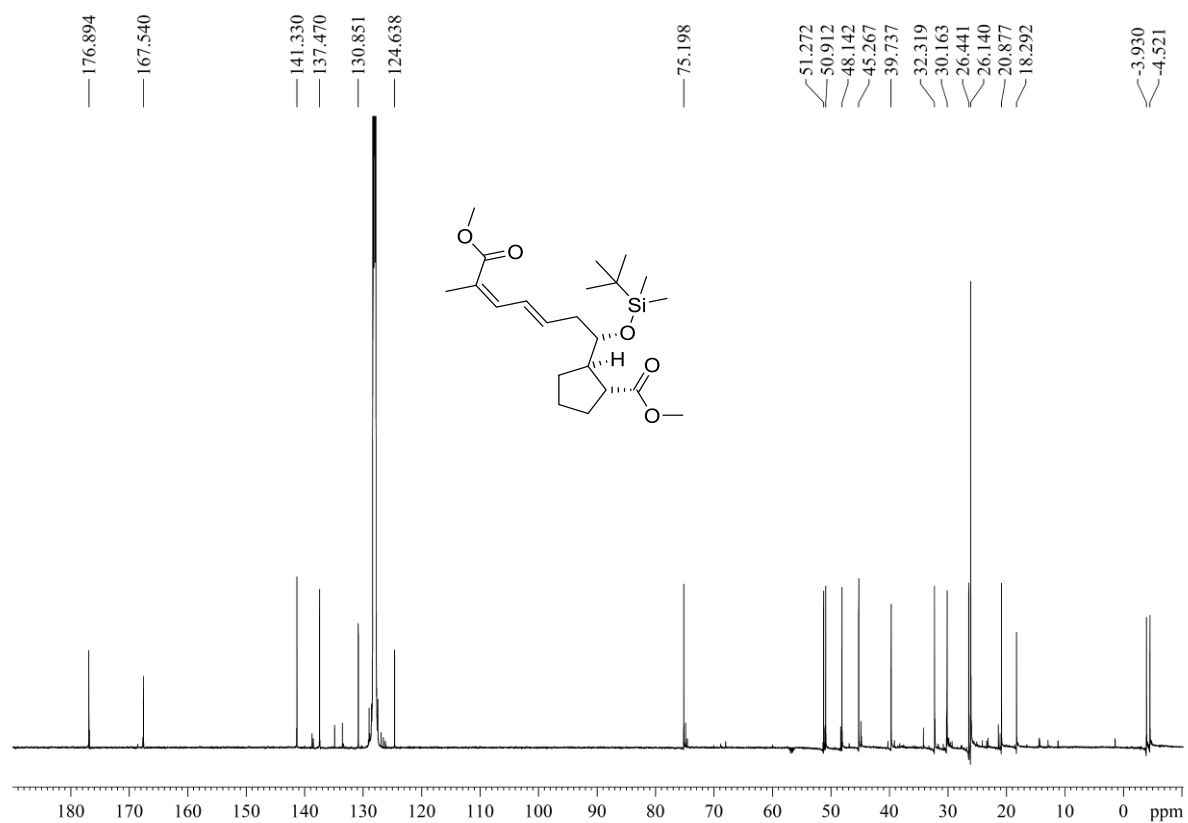

d<sub>6</sub>-benzene, 500 MHz

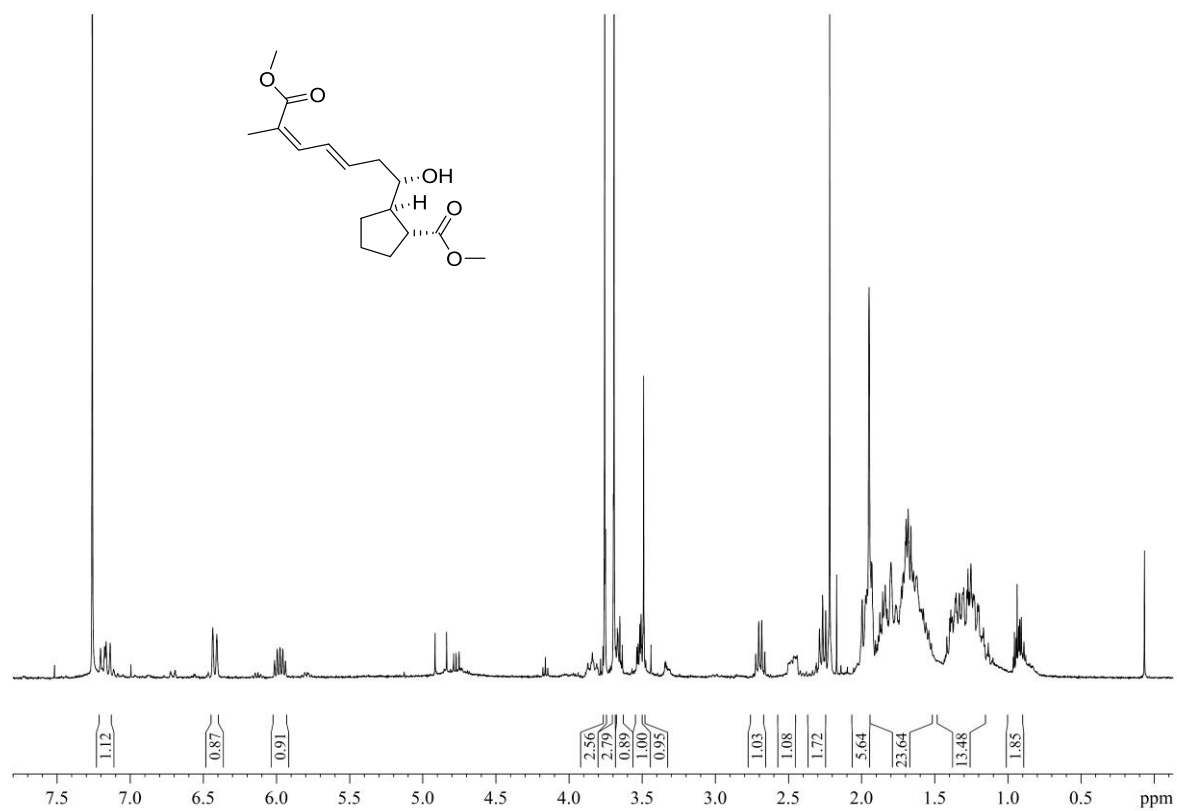

CDCl<sub>3</sub>, 400 MHz

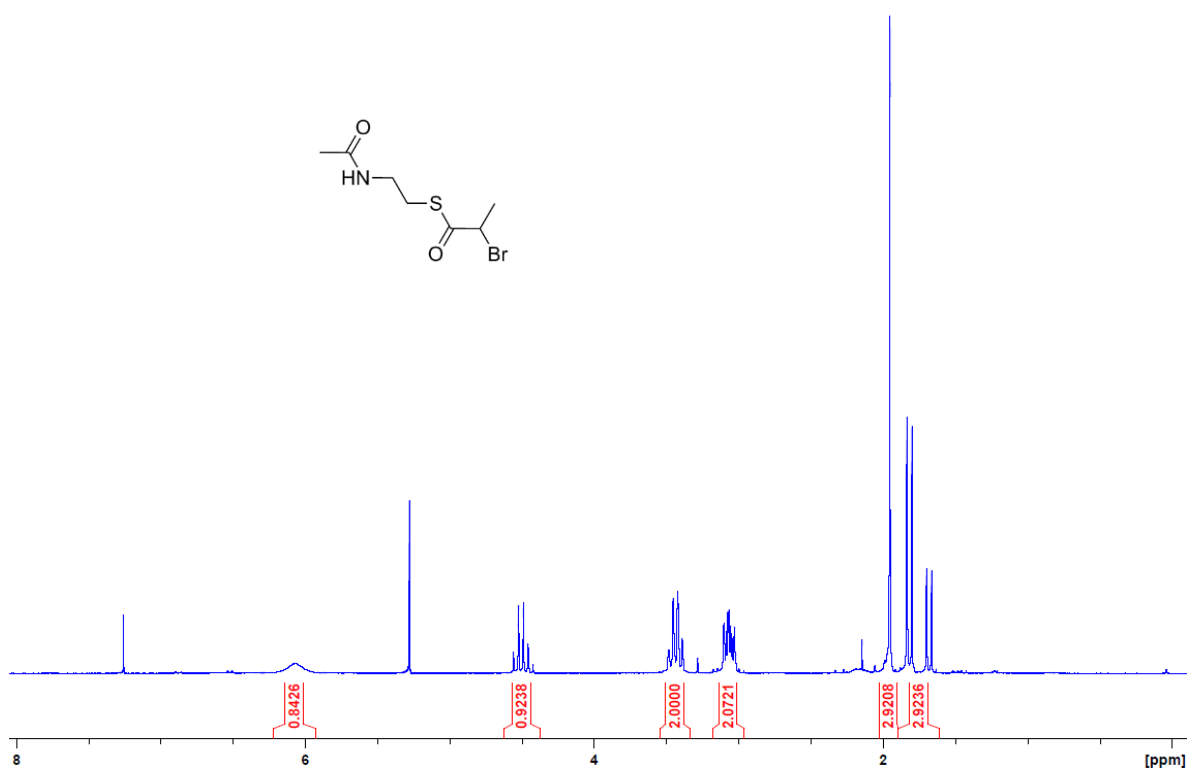



CDCl<sub>3</sub>, 100 MHz

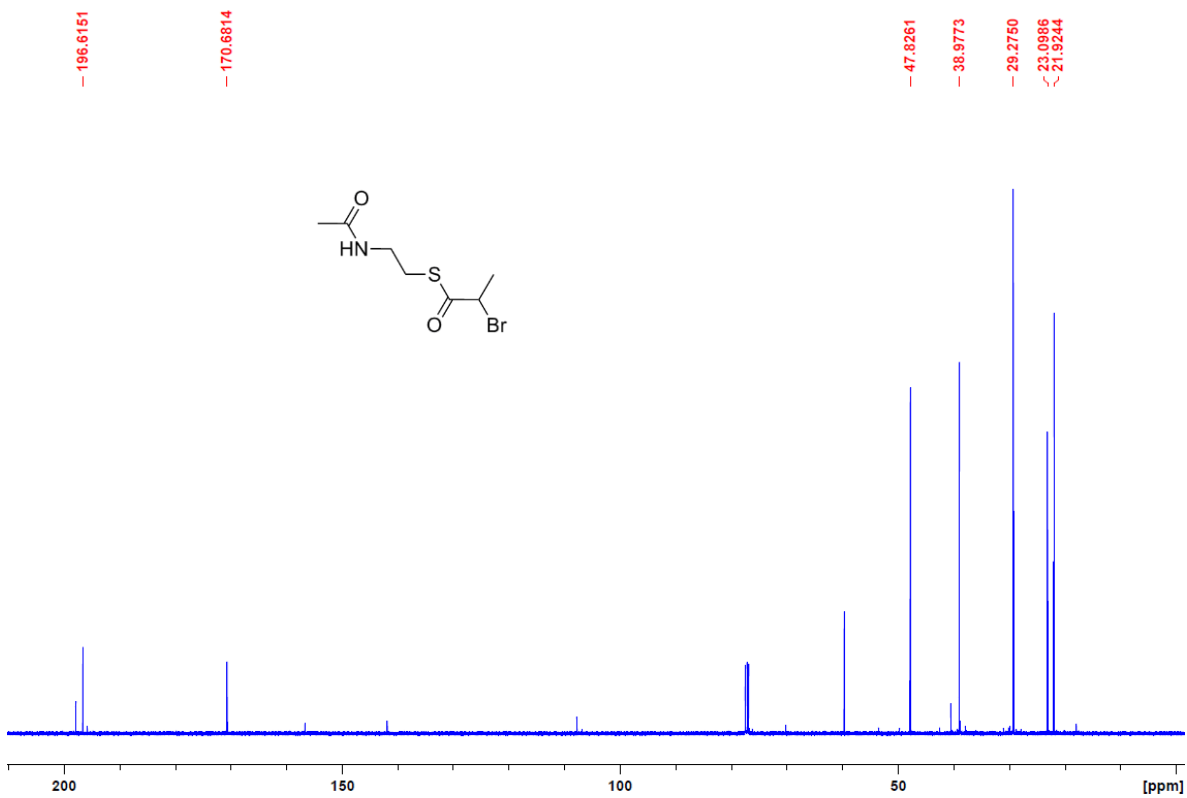

CDCl<sub>3</sub>, 400 MHz

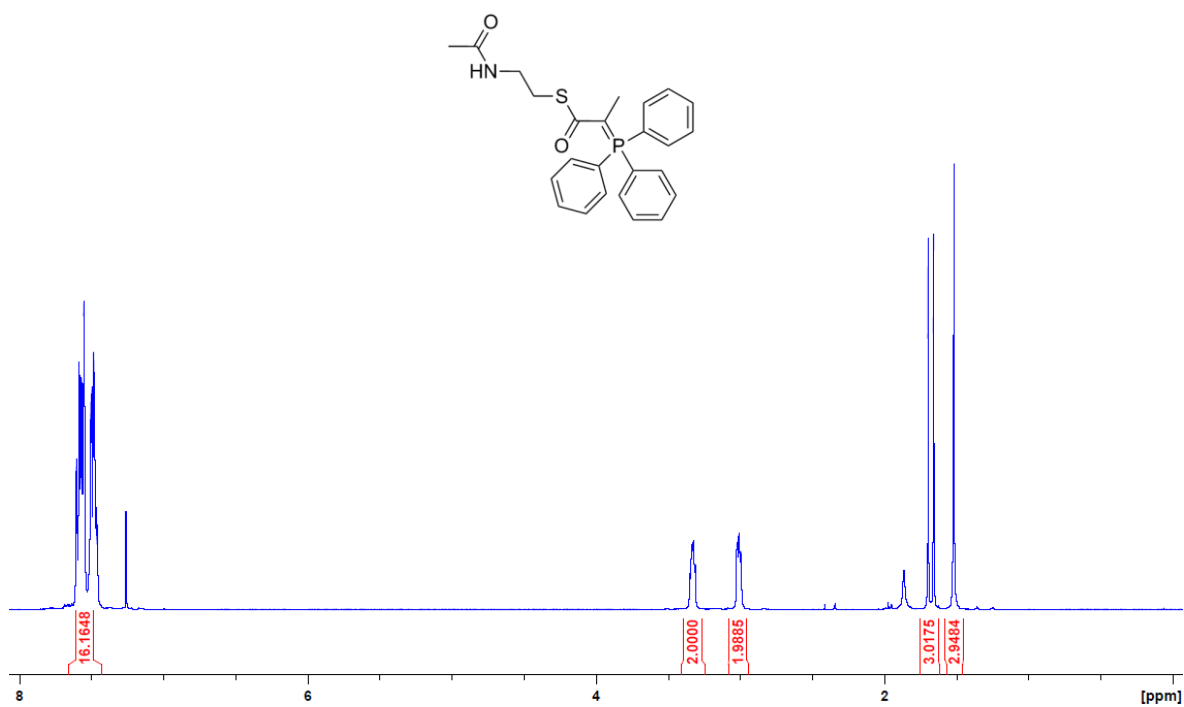

CDCl<sub>3</sub>, 100 MHz

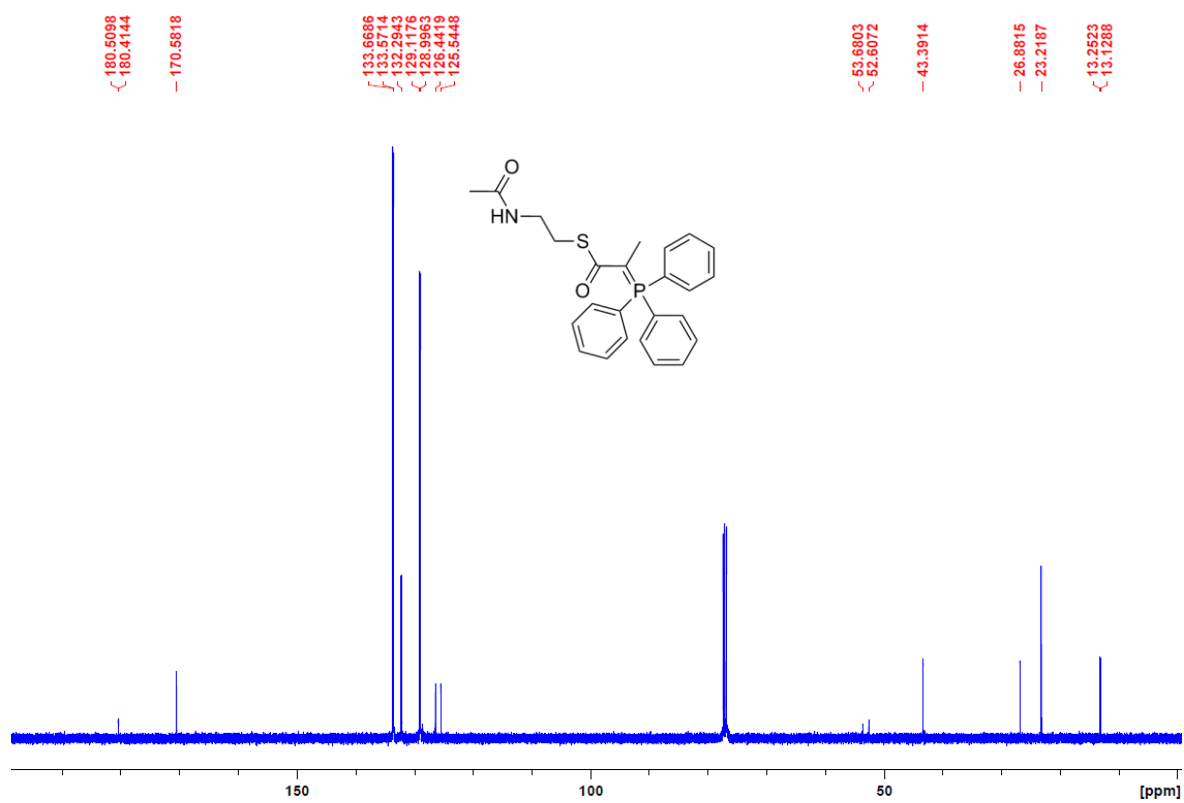

d<sub>6</sub>-acetone, 500 MHz

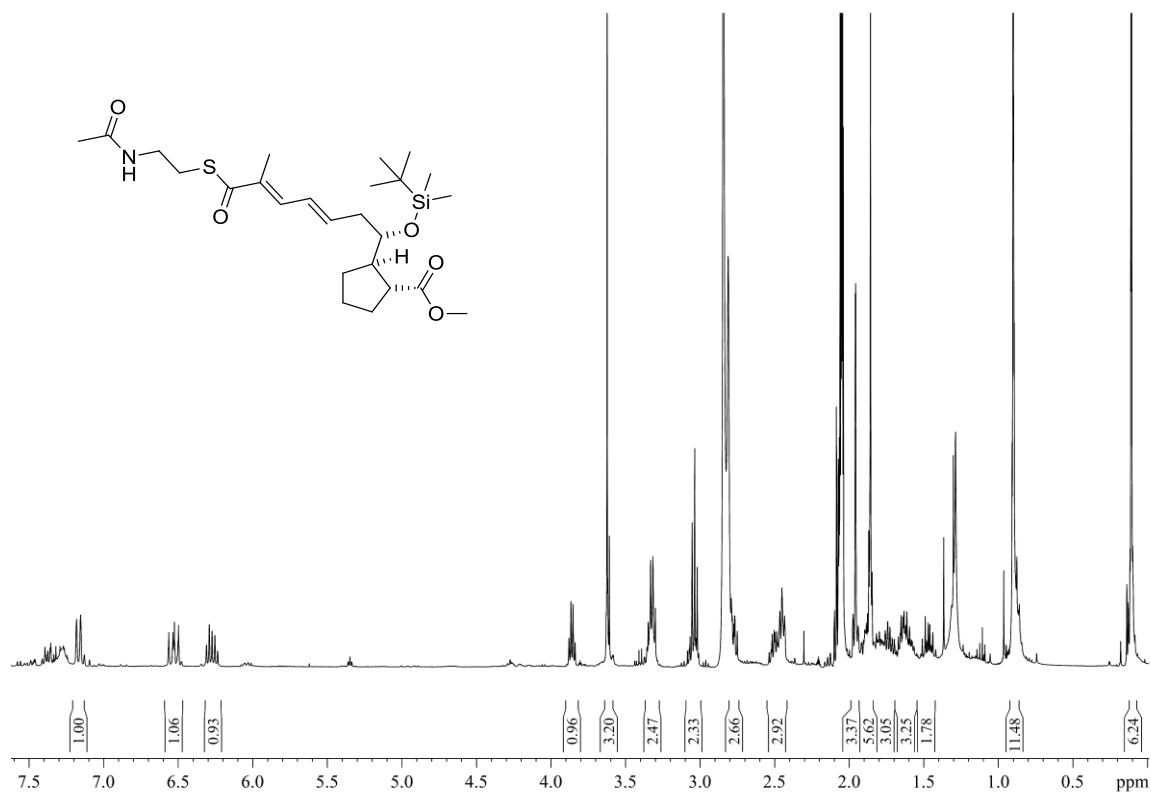

d<sub>6</sub>-acetone, 125 MHz

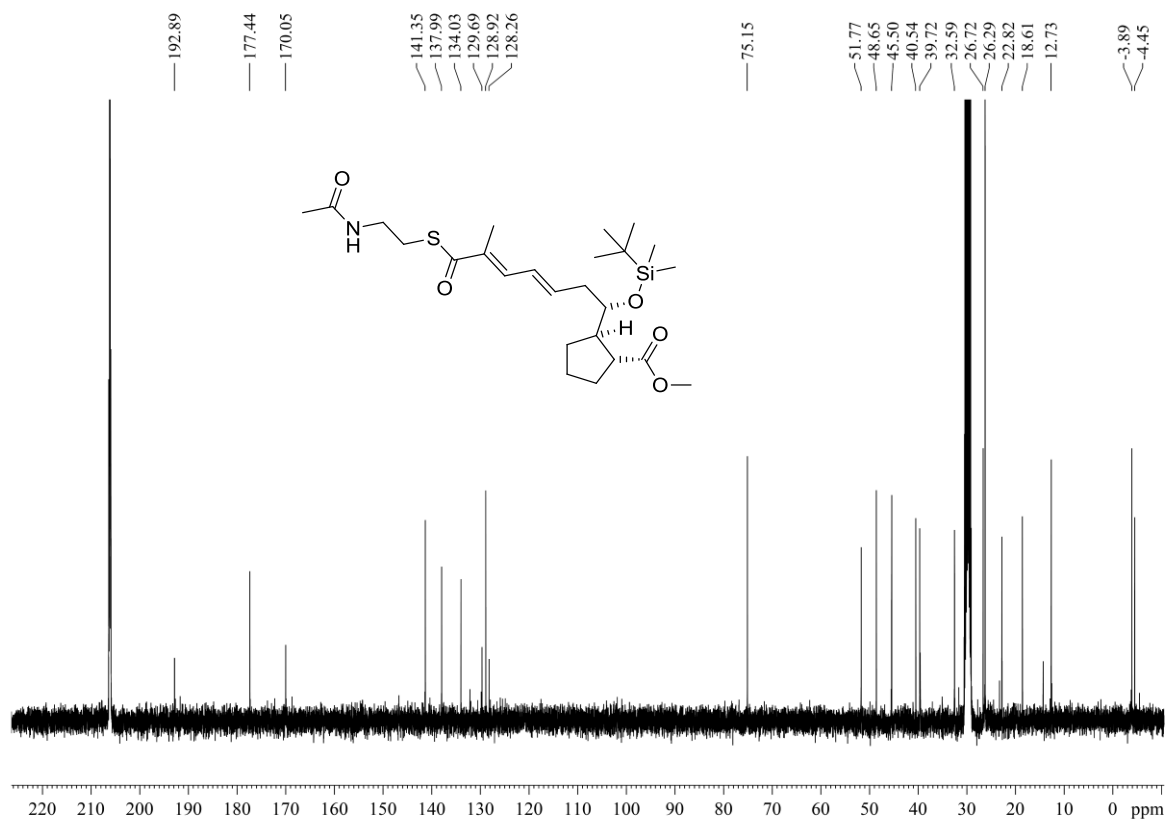

d<sub>6</sub>-acetone, 500 MHz

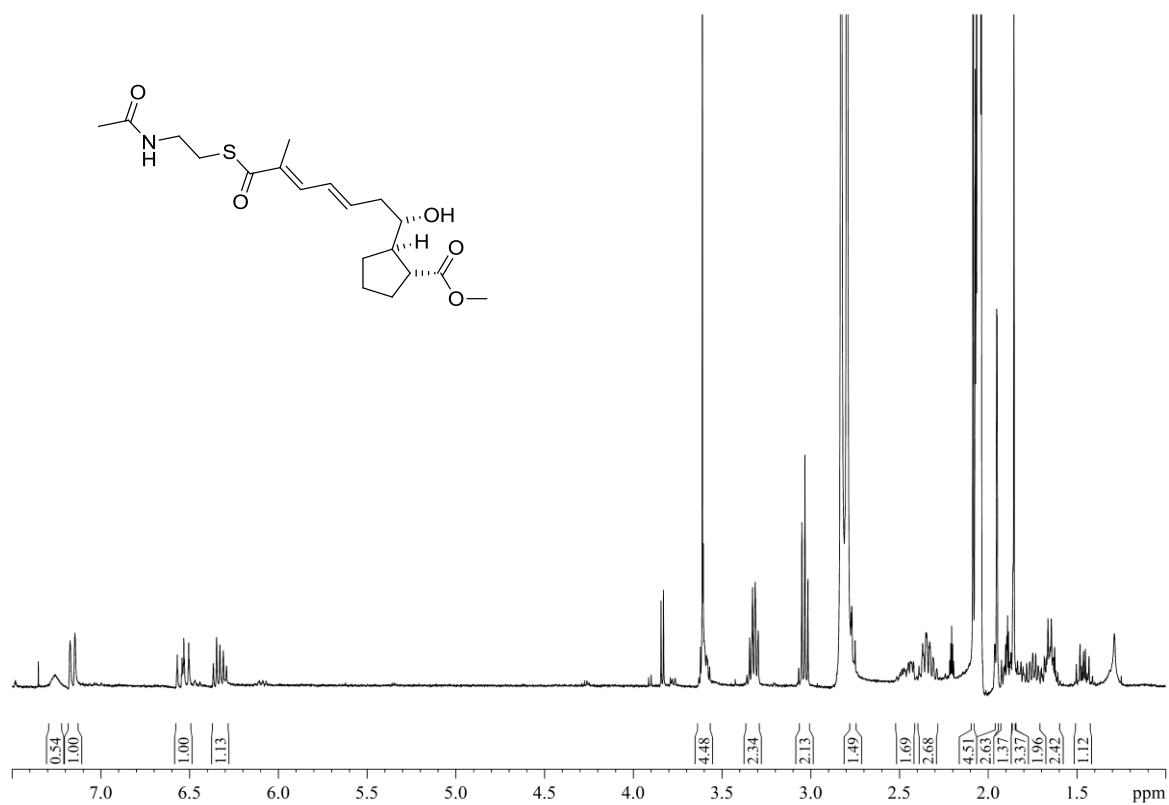

d<sub>6</sub>-acetone, 125 MHz

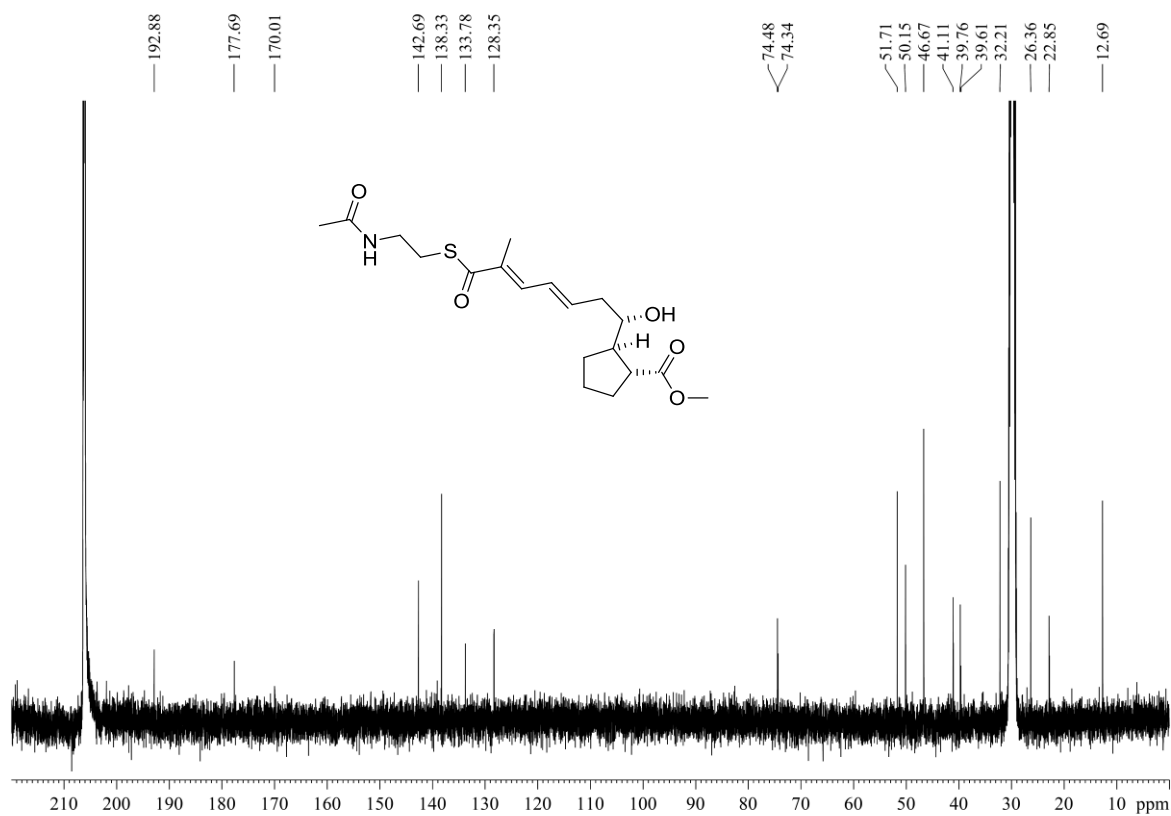

CDCl<sub>3</sub>, 400 MHz

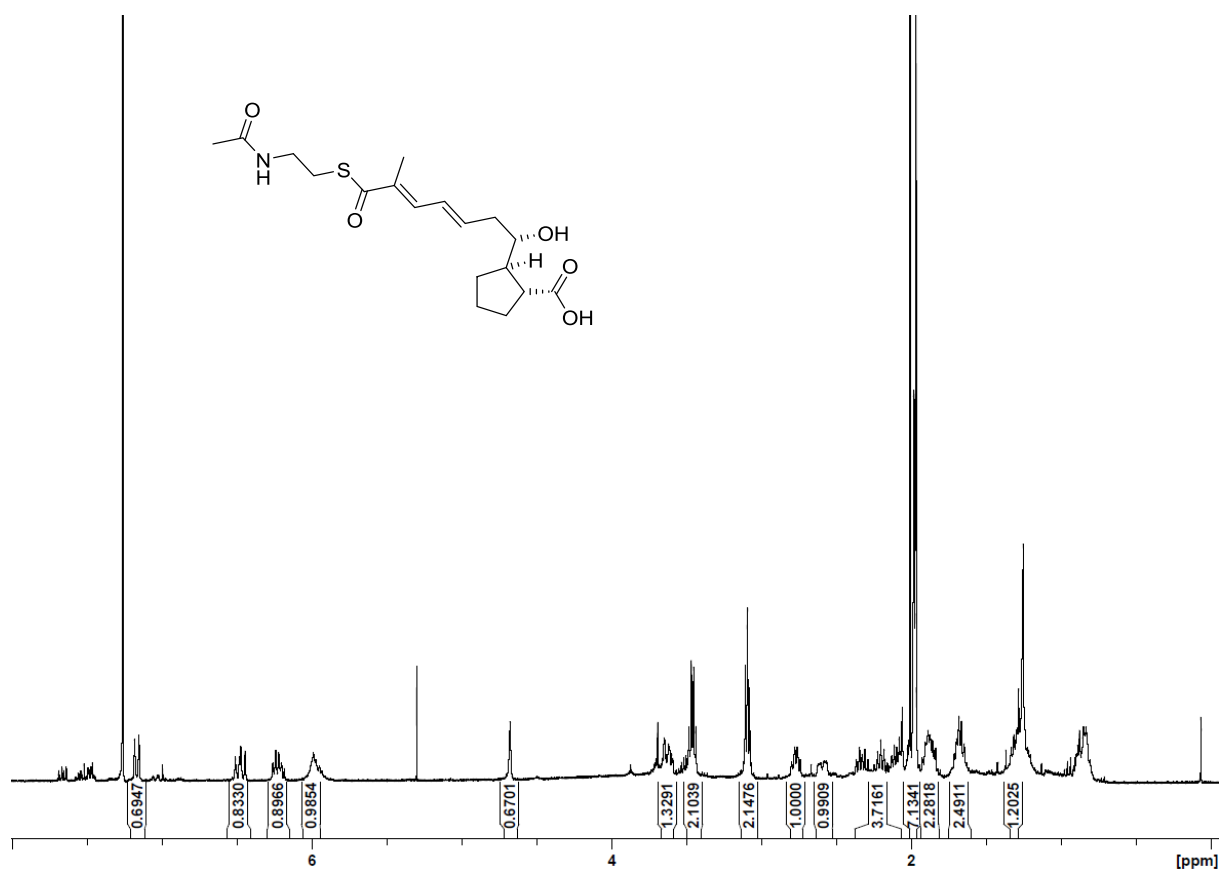

CDCl<sub>3</sub>, 100 MHz

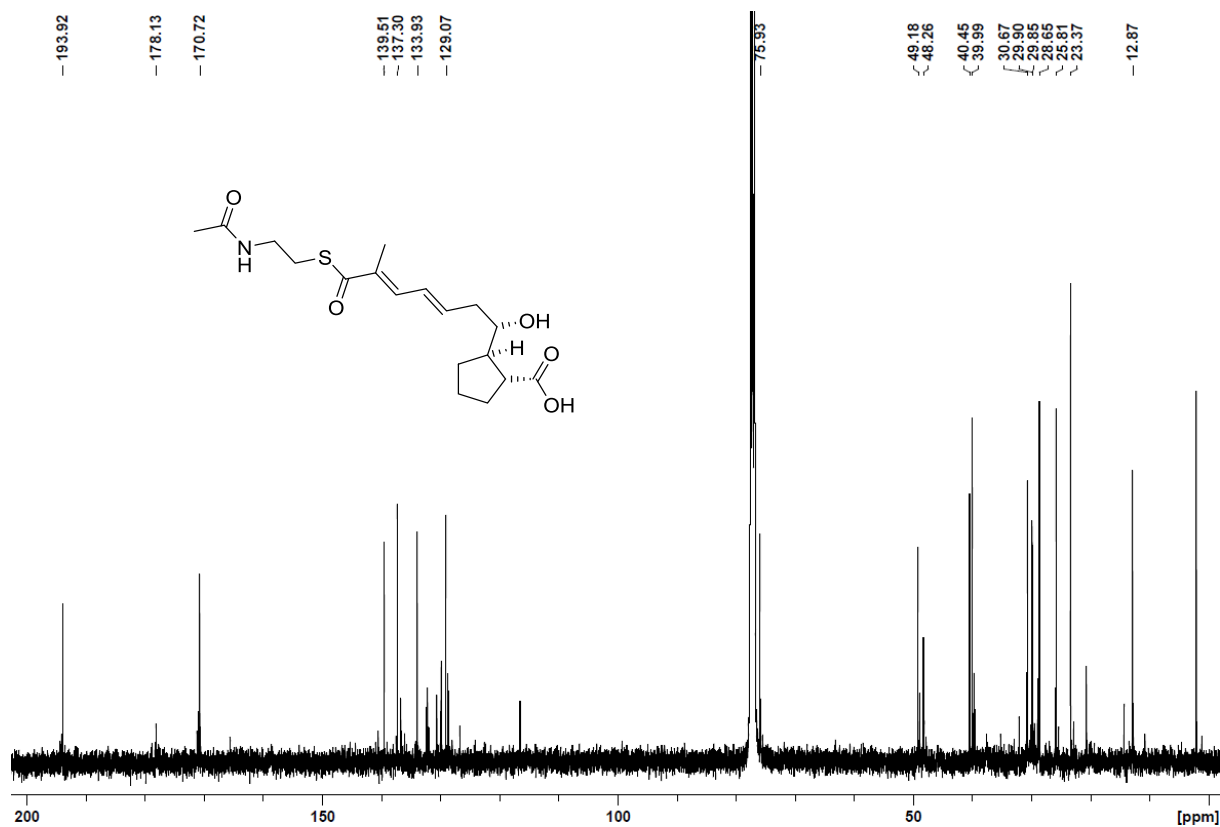

Supplement: Beilstein_J_Org_Chem-10-634-s002.pdf [file Beilstein_J_Org_Chem-10-634-s002.pdf]
